# Supplementary material for: Systematic review with meta‐analysis: rifaximin is effective and safe for the treatment of small intestine bacterial overgrowth
Source: PubMed Central journal article supplement — Aliment Pharmacol Ther. 2017 Jan 12;45(5):604–16. doi: 10.1111/apt.13928 (PMC5299503; doi:10.1111/apt.13928), 2017-01-12

**Supporting Information Table A.** Characteristics of the studies included in the systematic review and meta-analysis.

| Authors                     | Type of publication and study | Country | Clinical Setting           | Prior antibiotic use allowed    | Test to diagnose SIBO | Criteria used to diagnose SIBO                                                                                                                                                                                                                                                              | Patients in the rifaximin arm | Dosage of rifaximin                     | Duration of therapy | Time of follow-up      |
|-----------------------------|-------------------------------|---------|----------------------------|---------------------------------|-----------------------|---------------------------------------------------------------------------------------------------------------------------------------------------------------------------------------------------------------------------------------------------------------------------------------------|-------------------------------|-----------------------------------------|---------------------|------------------------|
| Corazza et al.(1988)[29]    | Full Paper Cohort Study       | Italy   | GI                         | nr                              | LHBT                  | Presence of a hydrogen peak > 10 ppm above the fasting level (basal value) and preceding the colonic excretion peak by at least 20 min                                                                                                                                                      | 12                            | 800 mg/die<br>1200 mg/die               | 5 days              | 1 day after EOT        |
| Biancone et al.(2000)[30]   | Full Paper RCT                | Italy   | GI                         | None within prior 1 month       | GHBT                  | In at least one sample an H <sub>2</sub> level increase higher than 12 ppm when compared with minimum value before this increase                                                                                                                                                            | 7                             | 1200 mg/die                             | 7 days              | 7 days after EOT       |
| Di Stefano et al.(2000)[31] | Full Paper RCT                | Italy   | GI                         | None within prior 1 month       | GHBT                  | an increase in breath H <sub>2</sub> excretion > 12 ppm over the baseline value within 2 hours of the ingestion of a glucose solution or an increase in breath H <sub>2</sub> excretion > 12 ppm in the fasting state                                                                       | 13                            | 1200 mg/die                             | 7 days              | 3 day after EOT        |
| Cuoco et al. (2002)[32]     | Full Paper Cohort Study       | Italy   | Extra GI (DM type I or II) | None within prior 3 months      | LHBT                  | Early peak of H <sub>2</sub> represented by the findings of two consecutive values more than 10 ppm above the baseline values                                                                                                                                                               | 21                            | 1200 mg/die                             | 10 days             | 1 month after EOT      |
| Tursi et al. (2003)[33]     | Full Paper Cohort Study       | Italy   | GI                         | nr                              | LHBT                  | Presence of a peak >20 ppm occurring >15 min before the colonic peak; also patients with an elevated fasting H <sub>2</sub> combined with an early increase in H <sub>2</sub> after lactulose ingestion were considered positive for bacterial overgrowth                                   | 10                            | 800 mg/die                              | 7 days              | 1 month after EOT      |
| Lauritano et al. (2005)[34] | Full Paper RCT                | Italy   | GI                         | None within prior 1 month       | GHBT                  | Increase in H <sub>2</sub> excretion >12 ppm over the baseline value within 2 hrs                                                                                                                                                                                                           | 90                            | 600 mg/die<br>800 mg/die<br>1200 mg/die | 7 days              | 1 month after EOT      |
| Tursi et al. (2005)[35]     | Full Paper Cohort Study       | Italy   | GI                         | nr                              | LHBT                  | Presence of a H <sub>2</sub> peak >20 ppm occurring >15 min before the colonic peak; also patients with an elevated fasting H <sub>2</sub> combined with an early increase in H <sub>2</sub> after lactulose ingestion were considered positive for bacterial overgrowth                    | 53                            | 800 mg/die                              | 10 days             | 8 weeks after EOT      |
| Cazzato et al. (2006)[36]   | Cohort Study                  | Italy   | GI                         | nr                              | GHBT                  | Increase in H <sub>2</sub> excretion >12 ppm over the baseline value                                                                                                                                                                                                                        | 19                            | 1200 mg/die                             | 7 days              | 1 month after EOT      |
| Cuoco et al. (2006)[37]     | Full Paper Cohort Study       | Italy   | GI                         | nr                              | GHBT                  | At least one of the sample expired air the H <sub>2</sub> value was more than 10 ppm higher than baseline value                                                                                                                                                                             | 23                            | 1200 mg/die                             | 14 days             | 4-5 months after EOT   |
| D'incà et al. (2007)[38]    | Full Paper Cross-Over RCT     | Italy   | GI                         | None within prior 1 month       | LHBT                  | Presence of an early increase (> 10 ppm above the baseline level) in H <sub>2</sub> after lactulose ingestion in at least two consecutive samples, or an increase in H <sub>2</sub> value (> 20 ppm above the baseline level) occurring ≥ 20 min after the early increase in H <sub>2</sub> | 21                            | 1200 mg/die                             | 14 days             | within 3 day after EOT |
| Esposito et al. (2007)[39]  | Full Paper Cohort Study       | Italy   | GI                         | No patients under antibiotic tx | LHBT                  | An elevated breath hydrogen concentration higher than 10 ppm over basal values                                                                                                                                                                                                              | 33                            | 1200 mg/die                             | 7 days              | 7 days after EOT       |

nr, not reported; RCT, randomized controlled trial; GI, gastrointestinal; LHBT, lactulose hydrogen breath test; GHBT, glucose hydrogen breath test; min, minutes; hrs, hours; ppm, part per million; EOT, end of treatment; DM, Diabetes mellitus.

**Supporting Information Table A.** Characteristics of the studies included in the systematic review and meta-analysis (continued).

| Authors                       | Type of publication and study | Country | Clinical Setting          | Prior antibiotic use allowed | Test to diagnose SIBO | Criteria used to diagnose SIBO                                                                                                                                                                             | Patients in the rifaximin arm | Dosage of rifaximin        | Duration of therapy | Time of follow-up       |
|-------------------------------|-------------------------------|---------|---------------------------|------------------------------|-----------------------|------------------------------------------------------------------------------------------------------------------------------------------------------------------------------------------------------------|-------------------------------|----------------------------|---------------------|-------------------------|
| Lauritano et al. (2007)[40]   | Full Paper Cohort Study       | Italy   | Extra GI (Hypothyroidism) | None within prior 3 months   | GHBT                  | Increase over the baseline of H <sub>2</sub> levels > 12 ppm                                                                                                                                               | 27                            | 1200 mg/die                | 7 days              | 1 month after EOT       |
| Majewski et al. (2007)[41]    | Full Paper Cohort Study       | USA     | GI                        | None within prior 1 month    | GHBT                  | A hydrogen and/or methane peak >20 ppm when the baseline was <10 ppm or in cases where the patient started with baseline of >10 ppm a further increase of >12 ppm indicated a positive result              | 8                             | 800 mg/die                 | 28 days             | within 7 days after EOT |
| Majewski et al. (2007)[42]    | Full Paper Cohort Study       | USA     | GI                        | None within prior 6 weeks    | GHBT                  | Hydrogen and methane peak was above 20 ppm when baseline was below 10 ppm or when the patient started with baseline above 10 ppm, a further increase of more than 12 ppm was indicative of positive result | 20                            | 800 mg/die                 | 28 days             | within 7 days after EOT |
| Resmini et al. (2007)[43]     | Full Paper Cohort Study       | Italy   | Extra GI (Acromegaly)     | nr                           | LHBT                  | Presence of two or more distinct peaks of H <sub>2</sub> excretion (10 ppm compared with the basal value)                                                                                                  | 18                            | 1200 mg/die                | 10 days             | 1 month after EOT       |
| Scarpellini et al. (2007)[44] | Full Paper RCT                | Italy   | GI                        | None within prior 3 months   | GHBT                  | An increase of H <sub>2</sub> levels over the baseline value was >12 ppm and/or CH <sub>4</sub> levels increased >100% with respect to the basal value                                                     | 80                            | 1200 mg/die<br>1600 mg/die | 7 days              | 1 month after EOT       |
| Yang et al. (2008)[45]        | Full Paper Cohort Study       | USA     | GI                        | nr                           | LHBT                  | Hydrogen or methane values rose to more than 20 ppm at or before 90 min. of ingestion of lactulose                                                                                                         | 50                            | 1200 mg/die                | 10 days             | within 1 week after EOT |
| Parodi et al. (2008)[46]      | Full Paper Cohort Study       | Italy   | Extra GI (Scleroderma)    | None within prior 2 weeks    | LHBT                  | Presence of two or more distinct peaks of H <sub>2</sub> /CH <sub>4</sub> excretion (>10 ppm compared to the basal value)                                                                                  | 30                            | 1200 mg/die                | 10 days             | 1 month after EOT       |
| Parodi et al. (2008)[47]      | Full Paper RCT                | Italy   | Extra GI (Rosacea)        | nr                           | LHBT- GHBT            | GHBT: a single H <sub>2</sub> /CH <sub>4</sub> peak higher than 10 ppm<br>LHBT: presence of 2 distinct peaks of H <sub>2</sub> /CH <sub>4</sub> excretion (>10 ppm compared with the basal value)          | 52                            | 1200 mg/die                | 10 days             | 1 month after EOT       |
| Lauritano et al. (2009)[48]   | Full Paper RCT                | Italy   | GI                        | None within prior 3 months   | GHBT                  | Increase over the baseline of H <sub>2</sub> levels >12 ppm                                                                                                                                                | 71                            | 1200 mg/die                | 7 days              | 1 month after EOT       |
| Parodi et al. (2009)[49]      | Full Paper Cohort Study       | Italy   | GI                        | None within prior 2 weeks    | GHBT                  | Single H <sub>2</sub> peak higher than 12 ppm                                                                                                                                                              | 23                            | 1200 mg/die                | 10 days             | 1 month after EOT       |

nr, not reported; RCT, randomized controlled trial; GI, gastrointestinal; LHBT, lactulose hydrogen breath test; GHBT, glucose hydrogen breath test; min, minutes; hrs, hours; ppm, part per million; EOT, end of treatment.

**Supporting Information Table A.** Characteristics of the studies included in the systematic review and meta-analysis (continued).

| Authors                     | Type of publication and study | Country     | Clinical Setting               | Prior antibiotic use allowed    | Test to diagnose SIBO | Criteria used to diagnose SIBO                                                                                                                                                                                                                                                                                                    | Patients in the rifaximin arm | Dosage of rifaximin | Duration of therapy | Time of follow-up     |
|-----------------------------|-------------------------------|-------------|--------------------------------|---------------------------------|-----------------------|-----------------------------------------------------------------------------------------------------------------------------------------------------------------------------------------------------------------------------------------------------------------------------------------------------------------------------------|-------------------------------|---------------------|---------------------|-----------------------|
| Peralta et al. (2009)[50]   | Full Paper Cohort Study       | Italy       | GI                             | No patients under antibiotic tx | LHBT                  | An early increase of H <sub>2</sub> concentration in the expired air higher than 20 ppm over basal values within 90 min of the oral administration of lactulose, followed by a second distinct peak after additional 15 min or more                                                                                               | 54                            | 1200 mg/die         | 7 days              | 3 weeks after EOT     |
| Furnari et al. (2010)[51]   | Full Paper RCT                | Italy       | GI                             | None within prior 10 days       | GHBT                  | A single peak of H <sub>2</sub> excretion higher than 12 ppm was the cut-off value for test positivity                                                                                                                                                                                                                            | 77                            | 1200 mg/die         | 10 days             | 4 weeks after EOT     |
| Lauritano et al. (2010)[52] | Full Paper Cohort Study       | Italy       | GI                             | nr                              | GHBT                  | Increase over baseline H <sub>2</sub> levels > 12 ppm                                                                                                                                                                                                                                                                             | 11                            | 1200 mg/die         | 7 days              | 1 month after EOT     |
| Lombardo et al. (2010)[53]  | Full Paper Cohort Study       | Italy       | GI                             | None within prior 6 months      | GHBT                  | Increase over the baseline H <sub>2</sub> level was >10 ppm                                                                                                                                                                                                                                                                       | 149                           | 1200 mg/die         | 14 days             | 2 months after EOT    |
| Cerda et al. (2012)[54]     | Abstract Cohort Study         | Mexico      | GI                             | nr                              | GHBT                  | Increase over the baseline level H <sub>2</sub> was >10 ppm                                                                                                                                                                                                                                                                       | 50                            | 1200 mg/die         | 10 days             | EOT                   |
| Meyrat et al. (2012)[55]    | Full Paper Cohort Study       | Switzerland | GI                             | None within prior 4 weeks       | LHBT                  | An increase in breath- H <sub>2</sub> concentration of at least 12 ppm above basal level was observed within 60 min of ingesting lactulose on the condition that this early rise in H <sub>2</sub> concentration preceded the second prolonged rise in H <sub>2</sub> concentration by at least 15 min                            | 64                            | 800 mg/die          | 14 days             | 2 weeks after EOT     |
| Fasano et al. (2013)[56]    | Full Paper Cohort Study       | Italy       | Extra GI (Parkinson's disease) | None within prior 1 month       | LHBT & GHBT           | GHBT: increase over the baseline of hydrogen levels > 12 ppm<br>LHBT: Presence of an early increase (> 10 ppm above the baseline level within 30-60 min) in H <sub>2</sub> after lactulose ingestion in two consecutive samples, or an increase in H <sub>2</sub> value (> 20 ppm above the baseline level)                       | 18                            | 1200 mg/die         | 7 days              | 1 month after EOT     |
| Boltin et al. (2014)[57]    | Full Paper Cohort Study       | Israel      | GI                             | None within prior 6 months      | LHBT                  | The test was considered positive for SIBO when an increase over the baseline level was >10 ppm                                                                                                                                                                                                                                    | 22                            | 1200 mg/die         | 10 days             | 2 weeks after EOT     |
| Chedid et al. (2014)[58]    | Full Paper Cohort Study       | USA         | GI                             | None within prior 3 months      | LHBT                  | A baseline breath concentration of >10 ppm for hydrogen or >7 ppm for methane only if patients were compliant with their preparation or an increase within 90 minutes (small intestine) that was followed by a larger peak (colonic), indicative of a positive study (with a decrease of at least 5 ppm following the first peak) | 67                            | 1200 mg/die         | 28 days             | EOT                   |
| Moraru et al. (2014)[59]    | Full Paper Cohort Study       | Romania     | GI                             | None within prior 4 weeks       | GHBT                  | A clear H <sub>2</sub> peak, exceeding 20 ppm before the 120 minutes have passed                                                                                                                                                                                                                                                  | 112                           | 1200 mg/die         | 7 days              | 1 week after EOT      |
| Gravina et al. (2015)[60]   | Full Paper Cohort Study       | Italy       | Extra GI (Rosacea)             | None within prior 2 months      | GHBT                  | Increasing over the baseline of H <sub>2</sub> levels, was more than 12 ppm in a least two readings                                                                                                                                                                                                                               | 16                            | 1200 mg/die         | 10 days             | 1 & 2 month after EOT |

nr, not reported; RCT, randomized controlled trial; GI, gastrointestinal; LHBT, lactulose hydrogen breath test; GHBT, glucose hydrogen breath test; min, minutes; hrs, hours; ppm, part per million; EOT, end of treatment; HGG, hydrolysed guar gum.

**Supporting Information**

**Table B.** Risk bias assessment of RCTs included into systematic review and meta-analysis.

|                           | Random sequence generation (selection bias) | Allocation concealment (selection bias) | Blinding of participants and personnel (performance bias) | Blinding of outcome assessment (detection bias) | Incomplete outcome data (attrition bias) | Selective reporting (reporting bias) | Other bias |
|---------------------------|---------------------------------------------|-----------------------------------------|-----------------------------------------------------------|-------------------------------------------------|------------------------------------------|--------------------------------------|------------|
| Biancone et al. (2000)    | ?                                           | ?                                       | ?                                                         | ?                                               | ?                                        | ?                                    | ?          |
| D'Inca et al. (2007)      | ?                                           | ?                                       | ?                                                         | ?                                               | +                                        | +                                    | +          |
| Di Stefano et al. (2000)  | ?                                           | ?                                       | ?                                                         | ?                                               | +                                        | +                                    | +          |
| Furnari et al. (2010)     | +                                           | ?                                       | ?                                                         | ?                                               | +                                        | +                                    | +          |
| Lauritano et al. (2005)   | +                                           | ?                                       | ?                                                         | ?                                               | +                                        | +                                    | +          |
| Lauritano et al. (2009)   | +                                           | ?                                       | ?                                                         | ?                                               | +                                        | +                                    | +          |
| Parodi et al. (2008)      | ?                                           | ?                                       | ?                                                         | ?                                               | +                                        | +                                    | +          |
| Scarpellini et al. (2007) | +                                           | ?                                       | ?                                                         | ?                                               | +                                        | +                                    | +          |

## Supporting Information

**Table C.** IHE's quality appraisal checklist for cohort studies [20].

|                                                                                                                   | Studies                       |                            |                            |                            |                              |
|-------------------------------------------------------------------------------------------------------------------|-------------------------------|----------------------------|----------------------------|----------------------------|------------------------------|
|                                                                                                                   | Corazza et al.<br>(1988) [29] | Cuoco et al.<br>(2002)[32] | Tursi et al.<br>(2003)[33] | Tursi et al.<br>(2005)[35] | Cazzato et al.<br>(2006)[36] |
| Criteria                                                                                                          |                               |                            |                            |                            |                              |
| <i>Study objective</i>                                                                                            |                               |                            |                            |                            |                              |
| 1. Was the hypothesis/aim/objective of the study clearly stated?                                                  | Y                             | Y                          | Y                          | Y                          | Y                            |
| <i>Study design</i>                                                                                               |                               |                            |                            |                            |                              |
| 2. Was the study conducted prospectively?                                                                         | U                             | U                          | U                          | Y                          | Y                            |
| 3. Were the cases collected in more than one center?                                                              | N                             | N                          | N                          | N                          | N                            |
| 4. Were patients recruited consecutively?                                                                         | U                             | U                          | Y                          | Y                          | Y                            |
| <i>Study population</i>                                                                                           |                               |                            |                            |                            |                              |
| 5. Were the characteristics of the patients included in the study described?                                      | Y                             | Y                          | Y                          | Y                          | Y                            |
| 6. Were the eligibility criteria (i.e. inclusion and exclusion criteria) for entry into the study clearly stated? | P                             | P                          | Y                          | Y                          | P                            |
| 7. Did patients enter the study at a similar point in the disease?                                                | U                             | U                          | Y                          | Y                          | U                            |
| <i>Intervention and coinervention</i>                                                                             |                               |                            |                            |                            |                              |
| 8. Was the intervention of interest clearly described?                                                            | Y                             | Y                          | Y                          | Y                          | Y                            |
| 9. Were additional interventions (cointerventions) clearly described?                                             | N                             | Y                          | N                          | Y                          | Y                            |
| <i>Outcome measures</i>                                                                                           |                               |                            |                            |                            |                              |
| 10. Were relevant outcome measures established a priori?                                                          | Y                             | Y                          | Y                          | Y                          | Y                            |
| 11. Were outcome assessors blinded to the intervention that patients received?                                    | N                             | N                          | N                          | N                          | N                            |
| 12. Were the relevant outcomes measured using appropriate objective/subjective methods?                           | Y                             | Y                          | Y                          | Y                          | Y                            |
| 13. Were the relevant outcome measures made before and after the intervention?                                    | Y                             | Y                          | Y                          | Y                          | Y                            |
| <i>Statistical analysis</i>                                                                                       |                               |                            |                            |                            |                              |
| 14. Were the statistical tests used to assess the relevant outcomes appropriate?                                  | Y                             | Y                          | Y                          | Y                          | Y                            |
| <i>Results and conclusions</i>                                                                                    |                               |                            |                            |                            |                              |
| 15. Was follow-up long enough for important events and outcomes to occur?                                         | Y                             | Y                          | Y                          | Y                          | Y                            |
| 16. Were losses to follow-up reported?                                                                            | Y                             | Y                          | Y                          | Y                          | Y                            |
| 17. Did the study provided estimates of random variability in the data analysis of relevant outcomes?             | Y                             | Y                          | Y                          | Y                          | Y                            |
| 18. Were the adverse events reported?                                                                             | N                             | Y                          | N                          | N                          | N                            |
| 19. Were the conclusions of the study supported by the results?                                                   | Y                             | Y                          | Y                          | Y                          | Y                            |
| <i>Competing interests and sources of support</i>                                                                 |                               |                            |                            |                            |                              |
| 20. Were both competing interests and sources of support for the study reported?                                  | N                             | N                          | N                          | N                          | N                            |

IHE, Institute of Health Economics; Y, Yes; N, No; P, Partial; U, Unclear.

## Supporting Information

**Table C.** IHE's quality appraisal checklist for cohort studies [20].

|                                                                                                                   | Studies                    |                               |                                |                               |                               |
|-------------------------------------------------------------------------------------------------------------------|----------------------------|-------------------------------|--------------------------------|-------------------------------|-------------------------------|
|                                                                                                                   | Cuoco et al.<br>(2006)[37] | Esposito et al.<br>(2007)[39] | Lauritano et al.<br>(2007)[40] | Majewski et al.<br>(2007)[41] | Majewski et al.<br>(2007)[42] |
| Criteria                                                                                                          |                            |                               |                                |                               |                               |
| <i>Study objective</i>                                                                                            |                            |                               |                                |                               |                               |
| 1. Was the hypothesis/aim/objective of the study clearly stated?                                                  | Y                          | Y                             | Y                              | Y                             | Y                             |
| <i>Study design</i>                                                                                               |                            |                               |                                |                               |                               |
| 2. Was the study conducted prospectively?                                                                         | N                          | Y                             | Y                              | U                             | Y                             |
| 3. Were the cases collected in more than one center?                                                              | N                          | N                             | N                              | N                             | N                             |
| 4. Were patients recruited consecutively?                                                                         | U                          | Y                             | Y                              | U                             | Y                             |
| <i>Study population</i>                                                                                           |                            |                               |                                |                               |                               |
| 5. Were the characteristics of the patients included in the study described?                                      | Y                          | Y                             | Y                              | Y                             | P                             |
| 6. Were the eligibility criteria (i.e. inclusion and exclusion criteria) for entry into the study clearly stated? | Y                          | Y                             | Y                              | Y                             | Y                             |
| 7. Did patients enter the study at a similar point in the disease?                                                | U                          | U                             | N                              | U                             | U                             |
| <i>Intervention and cointervention</i>                                                                            |                            |                               |                                |                               |                               |
| 8. Was the intervention of interest clearly described?                                                            | Y                          | Y                             | Y                              | Y                             | Y                             |
| 9. Were additional interventions (cointerventions) clearly described?                                             | Y                          | N                             | Y                              | N                             | N                             |
| <i>Outcome measures</i>                                                                                           |                            |                               |                                |                               |                               |
| 10. Were relevant outcome measures established a priori?                                                          | Y                          | Y                             | Y                              | Y                             | Y                             |
| 11. Were outcome assessors blinded to the intervention that patients received?                                    | N                          | N                             | N                              | N                             | N                             |
| 12. Were the relevant outcomes measured using appropriate objective/subjective methods?                           | Y                          | Y                             | Y                              | Y                             | Y                             |
| 13. Were the relevant outcome measures made before and after the intervention?                                    | Y                          | Y                             | Y                              | Y                             | Y                             |
| <i>Statistical analysis</i>                                                                                       |                            |                               |                                |                               |                               |
| 14. Were the statistical tests used to assess the relevant outcomes appropriate?                                  | Y                          | Y                             | Y                              | Y                             | Y                             |
| <i>Results and conclusions</i>                                                                                    |                            |                               |                                |                               |                               |
| 15. Was follow-up long enough for important events and outcomes to occur?                                         | Y                          | Y                             | Y                              | Y                             | Y                             |
| 16. Were losses to follow-up reported?                                                                            | Y                          | Y                             | Y                              | N                             | Y                             |
| 17. Did the study provided estimates of random variability in the data analysis of relevant outcomes?             | Y                          | Y                             | Y                              | Y                             | Y                             |
| 18. Were the adverse events reported?                                                                             | N                          | Y                             | Y                              | Y                             | Y                             |
| 19. Were the conclusions of the study supported by the results?                                                   | Y                          | Y                             | Y                              | Y                             | Y                             |
| <i>Competing interests and sources of support</i>                                                                 |                            |                               |                                |                               |                               |
| 20. Were both competing interests and sources of support for the study reported?                                  | N                          | N                             | Y                              | N                             | N                             |

IHE, Institute of Health Economics; Y, Yes; N, No; P, Partial; U, Unclear.

## Supporting Information

**Table C.** IHE's quality appraisal checklist for cohort studies [20].

|                                                                                                                   | Studies                      |                           |                             |                             |                              |
|-------------------------------------------------------------------------------------------------------------------|------------------------------|---------------------------|-----------------------------|-----------------------------|------------------------------|
|                                                                                                                   | Resmini et al.<br>(2007)[43] | Yang et al.<br>(2008)[45] | Parodi et al.<br>(2008)[46] | Parodi et al.<br>(2009)[49] | Peralta et al.<br>(2009)[50] |
| Criteria                                                                                                          |                              |                           |                             |                             |                              |
| <i>Study objective</i>                                                                                            |                              |                           |                             |                             |                              |
| 1. Was the hypothesis/aim/objective of the study clearly stated?                                                  | Y                            | Y                         | Y                           | Y                           | Y                            |
| <i>Study design</i>                                                                                               |                              |                           |                             |                             |                              |
| 2. Was the study conducted prospectively?                                                                         | Y                            | N                         | Y                           | Y                           | Y                            |
| 3. Were the cases collected in more than one center?                                                              | N                            | N                         | N                           | N                           | N                            |
| 4. Were patients recruited consecutively?                                                                         | U                            | Y                         | Y                           | Y                           | U                            |
| <i>Study population</i>                                                                                           |                              |                           |                             |                             |                              |
| 5. Were the characteristics of the patients included in the study described?                                      | Y                            | N                         | Y                           | Y                           | Y                            |
| 6. Were the eligibility criteria (i.e. inclusion and exclusion criteria) for entry into the study clearly stated? | Y                            | Y                         | Y                           | Y                           | Y                            |
| 7. Did patients enter the study at a similar point in the disease?                                                | N                            | U                         | N                           | U                           | U                            |
| <i>Intervention and coinervention</i>                                                                             |                              |                           |                             |                             |                              |
| 8. Was the intervention of interest clearly described?                                                            | Y                            | Y                         | Y                           | Y                           | Y                            |
| 9. Were additional interventions (cointerventions) clearly described?                                             | Y                            | N                         | Y                           | N                           | N                            |
| <i>Outcome measures</i>                                                                                           |                              |                           |                             |                             |                              |
| 10. Were relevant outcome measures established a priori?                                                          | Y                            | Y                         | Y                           | Y                           | Y                            |
| 11. Were outcome assessors blinded to the intervention that patients received?                                    | N                            | N                         | N                           | N                           | N                            |
| 12. Were the relevant outcomes measured using appropriate objective/subjective methods?                           | Y                            | Y                         | Y                           | Y                           | Y                            |
| 13. Were the relevant outcome measures made before and after the intervention?                                    | Y                            | Y                         | Y                           | Y                           | Y                            |
| <i>Statistical analysis</i>                                                                                       |                              |                           |                             |                             |                              |
| 14. Were the statistical tests used to assess the relevant outcomes appropriate?                                  | Y                            | Y                         | Y                           | Y                           | Y                            |
| <i>Results and conclusions</i>                                                                                    |                              |                           |                             |                             |                              |
| 15. Was follow-up long enough for important events and outcomes to occur?                                         | Y                            | Y                         | Y                           | Y                           | Y                            |
| 16. Were losses to follow-up reported?                                                                            | Y                            | U                         | Y                           | Y                           | Y                            |
| 17. Did the study provided estimates of random variability in the data analysis of relevant outcomes?             | Y                            | Y                         | Y                           | Y                           | Y                            |
| 18. Were the adverse events reported?                                                                             | Y                            | N                         | Y                           | N                           | Y                            |
| 19. Were the conclusions of the study supported by the results?                                                   | Y                            | Y                         | Y                           | Y                           | Y                            |
| <i>Competing interests and sources of support</i>                                                                 |                              |                           |                             |                             |                              |
| 20. Were both competing interests and sources of support for the study reported?                                  | Y                            | Y                         | Y                           | Y                           | N                            |

IHE, Institute of Health Economics; Y, Yes; N, No; P, Partial; U, Unclear.

## Supporting Information

**Table C.** IHE's quality appraisal checklist for cohort studies [20].

|                                                                                                                   | Studies                        |                               |                            |                             |                             |
|-------------------------------------------------------------------------------------------------------------------|--------------------------------|-------------------------------|----------------------------|-----------------------------|-----------------------------|
|                                                                                                                   | Lauritano et al.<br>(2010)[52] | Lombardo et al.<br>(2010)[53] | Cerda et al.<br>(2012)[54] | Meyrat et al.<br>(2012)[55] | Fasano et al.<br>(2013)[56] |
| Criteria                                                                                                          |                                |                               |                            |                             |                             |
| <i>Study objective</i>                                                                                            |                                |                               |                            |                             |                             |
| 1. Was the hypothesis/aim/objective of the study clearly stated?                                                  | Y                              | Y                             | Y                          | Y                           | Y                           |
| <i>Study design</i>                                                                                               |                                |                               |                            |                             |                             |
| 2. Was the study conducted prospectively?                                                                         | U                              | Y                             | U                          | Y                           | Y                           |
| 3. Were the cases collected in more than one center?                                                              | N                              | N                             | U                          | N                           | U                           |
| 4. Were patients recruited consecutively?                                                                         | U                              | Y                             | U                          | Y                           | Y                           |
| <i>Study population</i>                                                                                           |                                |                               |                            |                             |                             |
| 5. Were the characteristics of the patients included in the study described?                                      | P                              | Y                             | P                          | Y                           | Y                           |
| 6. Were the eligibility criteria (i.e. inclusion and exclusion criteria) for entry into the study clearly stated? | P                              | Y                             | P                          | Y                           | Y                           |
| 7. Did patients enter the study at a similar point in the disease?                                                | U                              | U                             | U                          | U                           | U                           |
| <i>Intervention and cointervention</i>                                                                            |                                |                               |                            |                             |                             |
| 8. Was the intervention of interest clearly described?                                                            | Y                              | Y                             | Y                          | Y                           | Y                           |
| 9. Were additional interventions (cointerventions) clearly described?                                             | N                              | N                             | N                          | N                           | Y                           |
| <i>Outcome measures</i>                                                                                           |                                |                               |                            |                             |                             |
| 10. Were relevant outcome measures established a priori?                                                          | Y                              | Y                             | Y                          | Y                           | Y                           |
| 11. Were outcome assessors blinded to the intervention that patients received?                                    | N                              | N                             | N                          | N                           | N                           |
| 12. Were the relevant outcomes measured using appropriate objective/subjective methods?                           | Y                              | Y                             | Y                          | Y                           | Y                           |
| 13. Were the relevant outcome measures made before and after the intervention?                                    | Y                              | Y                             | Y                          | Y                           | Y                           |
| <i>Statistical analysis</i>                                                                                       |                                |                               |                            |                             |                             |
| 14. Were the statistical tests used to assess the relevant outcomes appropriate?                                  | Y                              | Y                             | Y                          | Y                           | Y                           |
| <i>Results and conclusions</i>                                                                                    |                                |                               |                            |                             |                             |
| 15. Was follow-up long enough for important events and outcomes to occur?                                         | Y                              | Y                             | Y                          | Y                           | Y                           |
| 16. Were losses to follow-up reported?                                                                            | U                              | Y                             | Y                          | U                           | Y                           |
| 17. Did the study provided estimates of random variability in the data analysis of relevant outcomes?             | Y                              | Y                             | Y                          | Y                           | Y                           |
| 18. Were the adverse events reported?                                                                             | N                              | Y                             | N                          | Y                           | Y                           |
| 19. Were the conclusions of the study supported by the results?                                                   | Y                              | Y                             | Y                          | Y                           | Y                           |
| <i>Competing interests and sources of support</i>                                                                 |                                |                               |                            |                             |                             |
| 20. Were both competing interests and sources of support for the study reported?                                  | Y                              | Y                             | Y                          | Y                           | Y                           |

IHE, Institute of Health Economics; Y, Yes; N, No; P, Partial; U, Unclear.



## Supporting Information

**Table C.** IHE's quality appraisal checklist for cohort studies [20].

|                                                                                                                   | Studies                     |                             |                             |                              |
|-------------------------------------------------------------------------------------------------------------------|-----------------------------|-----------------------------|-----------------------------|------------------------------|
|                                                                                                                   | Boltin et al.<br>(2014)[57] | Chedid et al.<br>(2014)[58] | Moraru et al.<br>(2014)[59] | Gravina et al.<br>(2015)[60] |
| Criteria                                                                                                          |                             |                             |                             |                              |
| <i>Study objective</i>                                                                                            |                             |                             |                             |                              |
| 1. Was the hypothesis/aim/objective of the study clearly stated?                                                  | Y                           | Y                           | Y                           | Y                            |
| <i>Study design</i>                                                                                               |                             |                             |                             |                              |
| 2. Was the study conducted prospectively?                                                                         | Y                           | N                           | Y                           | Y                            |
| 3. Were the cases collected in more than one center?                                                              | N                           | N                           | Y                           | N                            |
| 4. Were patients recruited consecutively?                                                                         | Y                           | U                           | Y                           | Y                            |
| <i>Study population</i>                                                                                           |                             |                             |                             |                              |
| 5. Were the characteristics of the patients included in the study described?                                      | Y                           | P                           | Y                           | Y                            |
| 6. Were the eligibility criteria (i.e. inclusion and exclusion criteria) for entry into the study clearly stated? | Y                           | Y                           | Y                           | Y                            |
| 7. Did patients enter the study at a similar point in the disease?                                                | U                           | U                           | U                           | N                            |
| <i>Intervention and coinervention</i>                                                                             |                             |                             |                             |                              |
| 8. Was the intervention of interest clearly described?                                                            | Y                           | Y                           | Y                           | Y                            |
| 9. Were additional interventions (cointerventions) clearly described?                                             | N                           | N                           | N                           | N                            |
| <i>Outcome measures</i>                                                                                           |                             |                             |                             |                              |
| 10. Were relevant outcome measures established a priori?                                                          | Y                           | Y                           | Y                           | Y                            |
| 11. Were outcome assessors blinded to the intervention that patients received?                                    | N                           | N                           | N                           | N                            |
| 12. Were the relevant outcomes measured using appropriate objective/subjective methods?                           | Y                           | Y                           | Y                           | Y                            |
| 13. Were the relevant outcome measures made before and after the intervention?                                    | Y                           | Y                           | Y                           | Y                            |
| <i>Statistical analysis</i>                                                                                       |                             |                             |                             |                              |
| 14. Were the statistical tests used to assess the relevant outcomes appropriate?                                  | Y                           | Y                           | Y                           | Y                            |
| <i>Results and conclusions</i>                                                                                    |                             |                             |                             |                              |
| 15. Was follow-up long enough for important events and outcomes to occur?                                         | Y                           | Y                           | Y                           | Y                            |
| 16. Were losses to follow-up reported?                                                                            | Y                           | Y                           | Y                           | Y                            |
| 17. Did the study provided estimates of random variability in the data analysis of relevant outcomes?             | Y                           | Y                           | Y                           | Y                            |
| 18. Were the adverse events reported?                                                                             | Y                           | Y                           | N                           | N                            |
| 19. Were the conclusions of the study supported by the results?                                                   | Y                           | Y                           | Y                           | Y                            |
| <i>Competing interests and sources of support</i>                                                                 |                             |                             |                             |                              |
| 20. Were both competing interests and sources of support for the study reported?                                  | Y                           | Y                           | Y                           | Y                            |

IHE, Institute of Health Economics; Y, Yes; N, No; P, Partial; U, Unclear.

## Supporting Information

**Table D.** Meta-regression of eradication rate according to ITT analyses (studies included: 24\*).

| Covariate                                              | Number of Studies | Coefficient | 95% CI          | p value |
|--------------------------------------------------------|-------------------|-------------|-----------------|---------|
| RCT                                                    | 6                 | ref         |                 |         |
| No RCT                                                 | 18                | 0.989       | 0.07 to 1.902   | 0.035   |
| Dosage of rifaximin                                    | 24                | 0.002       | 0.0003 to 0.003 | 0.020   |
| Duration of treatment                                  | 24                | -0.020      | -0.084 to 0.043 | 0.512   |
| GHBT                                                   | 14                | ref         |                 |         |
| LHBT                                                   | 10                | -0.717      | -1.535 to 0.099 | 0.081   |
| Sample Size ≥ 50 patients                              | 7                 | ref         |                 |         |
| Sample Size < 50 patients                              | 17                | -0.093      | -0.843 to 0.657 | 0.797   |
| Studies performed in Italy                             | 19                | ref         |                 |         |
| Studies not performed in Italy                         | 5                 | -0.610      | -1.808 to 0.587 | 0.299   |
| Rifaximin as only treatment                            | 21                | ref         |                 |         |
| Concomitant use of treatments affecting gut microbiota | 3                 | 2.031       | 0.662 to 3.400  | 0.005   |
| Follow-up within 1 week after EOT                      | 9                 | ref         |                 |         |
| Follow-up between 2 and 4 weeks after EOT              | 13                | -0.234      | -1.064 to 0.596 | 0.562   |
| Follow-up > 4 weeks after EOT                          | 2                 | 0.636       | -0.856 to 2.130 | 0.383   |

\*, being only two the studies where both breath tests were used [47, 56], these were not included in the regression analysis.  
ref, reference; EOT, end of treatment.

## Supporting Information

**Table E.** Sub-group analysis of eradication rate according to ITT analysis (studies included: 24\*).

| Variable                                                             | Number of Studies | Eradication Rate | 95% CI       |
|----------------------------------------------------------------------|-------------------|------------------|--------------|
| <b>Randomization</b>                                                 |                   |                  |              |
| RCTs                                                                 | 6                 | 65.8%            | 48.0 to 80.5 |
| Not RCTs                                                             | 18                | 71.4%            | 59.7 to 81.9 |
| <b>Daily dose of rifaximin and duration of treatment<sup>°</sup></b> |                   |                  |              |
| 600 mg/die for 7 days                                                | 1                 | 16.7%            | 7.3 to 33.6  |
| 800 mg/die for 5 days                                                | 1                 | 66.7%            | 30.0 to 90.3 |
| 800 mg/die for 7 days                                                | 2                 | 68.5%            | 1.5 to 93.7  |
| 800 mg/die for 10 days                                               | 1                 | 100%             | 93.2 to 100  |
| 800 mg/die for 28 days                                               | 1                 | 50.0%            | 29.9 to 70.1 |
| 1200 mg/die for 5 days                                               | 1                 | 66.7%            | 30.0 to 90.3 |
| 1200 mg/die for 7 days                                               | 10                | 62.9%            | 57.2 to 68.5 |
| 1200 mg/die for 10 days                                              | 9                 | 72.9%            | 62.3 to 82.4 |
| 1200 mg/die for 14 days                                              | 1                 | 87.9%            | 81.7 to 92.2 |
| 1200 mg/die for 28 days                                              | 1                 | 34.3%            | 24.1 to 46.3 |
| 1600 mg/die for 7 days                                               | 1                 | 80.0%            | 65.2 to 89.5 |
| <b>Type of H<sub>2</sub>BT used</b>                                  |                   |                  |              |
| GBT                                                                  | 14                | 70.8%            | 60.3 to 80.3 |
| LHBT                                                                 | 10                | 68.8%            | 47.4 to 86.9 |
| <b>Number of patients enrolled in the study</b>                      |                   |                  |              |
| ≥ 50 patients                                                        | 7                 | 73.4%            | 53.8 to 89.3 |
| < 50 patients                                                        | 17                | 67.7%            | 57.7 to 77.0 |
| <b>Country where the study was performed</b>                         |                   |                  |              |
| Italy                                                                | 19                | 73.8%            | 63.0 to 83.3 |
| Other Countries                                                      | 5                 | 55.8%            | 34.5 to 76.0 |
| <b>Concomitant use of treatments affecting gut microbiota</b>        |                   |                  |              |
| Yes                                                                  | 3                 | 95.1%            | 65.9 to 74.6 |
| No                                                                   | 21                | 65.6%            | 56.1 to 74.6 |
| <b>Length of Follow-up</b>                                           |                   |                  |              |
| Within 1 week                                                        | 9                 | 72.0%            | 51.1 to 89.1 |
| Between 2 and 4 weeks                                                | 13                | 65.6%            | 55.1 to 75.3 |
| > 4 weeks                                                            | 2                 | 88.2%            | 82.5 to 93.0 |

\*, being only two the studies where both breath tests were used [47, 56], these were not included in the sub-group analysis.

<sup>°</sup>: number of studies is > 24 as several trials had ≥ 2 arms evaluating different doses and/or treatment durations.

## Supporting Information

**Table F.** Synopsis of evaluation of symptoms in patients with SIBO after therapy in the studies included in the meta-analysis.

| Authors                      | Clinical Setting                                                                              | Diagnosis of IBS                          | Symptoms evaluated according to the Author definition                                                                                                                                                            | Symptom Response according to the Author definition                                                                                                                                                                                                                                                                                        |
|------------------------------|-----------------------------------------------------------------------------------------------|-------------------------------------------|------------------------------------------------------------------------------------------------------------------------------------------------------------------------------------------------------------------|--------------------------------------------------------------------------------------------------------------------------------------------------------------------------------------------------------------------------------------------------------------------------------------------------------------------------------------------|
| Corazza et al. (1988)[29]    | GI                                                                                            | nr                                        | Diarrhoea, bloating, weight loss, abdominal pain                                                                                                                                                                 | Improvement of symptoms in 87.5% (95% CI: 52.9 to 97.8) of the eradicated patients<br>Improvement of symptoms in 75.0% (95% CI: 30.1 to 95.4) of not eradicated patients                                                                                                                                                                   |
| Biancone et al. (2000)[30]   | GI<br>(Patients with Crohn's Disease)                                                         | nr                                        | CDAI                                                                                                                                                                                                             | No change in CDAI                                                                                                                                                                                                                                                                                                                          |
| Di Stefano et al. (2000)[31] | GI                                                                                            | nr                                        | GSS considering: abdominal pain, bloating, diarrhoea, borborygmi, lassitude, and anorexia evaluated and graded using a semi-quantitative scale (absent, mild, moderate, severe)                                  | Only patients in the rifaximin group showed a significant reduction in symptom score for diarrhoea, borborygmi, and lassitude after therapy. In addition, the reduction in mean cumulative score of the patients treated with rifaximin was significantly higher ( $p < 0.05$ ) than in those treated with chlortetracycline ( $p = 0.2$ ) |
| Cuoco et al. (2002)[32]      | Extra GI<br>(DM type I or II)                                                                 | nr                                        | GSS considering: bloating, diarrhoea, alternate alvine habits, using a four-point scale (absent, mild, moderate, severe)                                                                                         | Absence of symptoms in 72.2% (95% CI: 49.1 to 87.5) of the eradicated patients<br>No change of symptoms in 66.7% (95% CI: 20.8 to 93.9) of not eradicated patients                                                                                                                                                                         |
| Tursi et al. (2003)[33]      | GI<br>(Celiac Patients with persistence of gastrointestinal symptoms after gluten withdrawal) | nr                                        | GSS considering: diarrhoea, slow gastric emptying, abdominal discomfort /abdominal pain with meteorism; symptoms were graded using the following scale: absence, slight symptoms, mild symptoms, severe symptoms | Absence of symptoms in 100% (95% CI: 72.2 to 100) of the eradicated patients                                                                                                                                                                                                                                                               |
| Lauritano et al. (2005)[34]  | GI                                                                                            | nr                                        | nr                                                                                                                                                                                                               | nr                                                                                                                                                                                                                                                                                                                                         |
| Tursi et al. (2005)[35]      | GI<br>(acute uncomplicated diverticulitis)                                                    | nr                                        | Constipation, diarrhoea, abdominal pain, rectal bleeding, and mucus passage with the stools. Intensity of the symptoms quantified with a quantitative scale (0-10 according to increasing worsening of symptoms) | ne                                                                                                                                                                                                                                                                                                                                         |
| Cazzato et al. (2006)[36]    | GI<br>(NERD)                                                                                  | nr                                        | Heartburn relief                                                                                                                                                                                                 | Absence of heartburn in 64.3% (95% CI: 38.8 to 83.7) of eradicated patients<br>Absence of heartburn in 16.7% (95% CI: 31.0 to 56.4) of not eradicated patients                                                                                                                                                                             |
| Cuoco et al. (2006)[37]      | GI                                                                                            | Yes<br>(diagnostic criteria not reported) | Abdominal discomfort, abdominal pain, meteorism, abdominal distension, irregular bowel movement or diarrhoea, evaluated using a four-level score scale (absence, mild to moderate, severe, very severe)          | Statistically significant decrease of presence of symptoms ( $p < 0.05$ ) observed after treatment                                                                                                                                                                                                                                         |

GI, gastrointestinal; nr, not reported; IBS, irritable bowel syndrome; CDAI, Crohn's Disease Activity Index; GSS, global symptom score; NERD, non-erosive reflux disease; VAS, visual analogue scale; ne, not possible to extract data. \*, not possible to calculate 95% CI.

**Supporting Information**

**Table F.** Synopsis of evaluation of symptoms in patients with SIBO after therapy in the studies included in the meta-analysis (continued).

| Authors                       | Clinical Setting          | Diagnosis of IBS                                    | Symptoms evaluated according to the Author definition                                                                                                                                                                                                                                                           | Symptom Response according to the Author definition                                                                                                                                                                                                                                                                                                                                                       |
|-------------------------------|---------------------------|-----------------------------------------------------|-----------------------------------------------------------------------------------------------------------------------------------------------------------------------------------------------------------------------------------------------------------------------------------------------------------------|-----------------------------------------------------------------------------------------------------------------------------------------------------------------------------------------------------------------------------------------------------------------------------------------------------------------------------------------------------------------------------------------------------------|
| D'Incà et al. (2007)[38]      | GI (UDD)                  | nr                                                  | Upper or lower abdominal pain, bloating, tenesmus, straining, stool frequency and characteristics, tenderness, dyspepsia recorded and graded according to the four-level score scale (no symptoms, mild, moderate, and severe); a GSS was calculated; a VAS was used to evaluate the overall treatment efficacy | GSS significantly reduced in the rifaximin group, while it remained practically unchanged after placebo administration ( $p < 0.005$ ); a similar result was observed when symptoms were evaluated according to the VAS                                                                                                                                                                                   |
| Esposito et al. (2007)[39]    | GI                        | Yes (diagnostic criteria not reported)              | Chronic diarrhoea, upper abdominal pain, lower abdominal pain, tenesmus, pain to palpation, abdominal bloating, flatulence, reduced body weight, nausea, steatorrhea, megaloblastic anaemia, stipsis, fever, others; GSS by means of VAS                                                                        | Significantly reduction of symptom score from baseline in eradicated patients ( $p = 0.004$ )                                                                                                                                                                                                                                                                                                             |
| Lauritano et al. (2007)[40]   | Extra GI (Hypothyroidism) | nr                                                  | Abdominal discomfort/pain, bloating, flatulence, constipation, and diarrhoea assessed by a four-point scale (absence, mild, moderate, and severe symptoms)                                                                                                                                                      | A significant improvement in abdominal discomfort ( $p < 0.01$ ), bloating ( $p < 0.01$ ), and flatulence ( $p < 0.01$ ) was observed in the eradicated patients                                                                                                                                                                                                                                          |
| Majewski et al. (2007)[41]    | GI                        | Yes (Rome II Criteria)                              | Symptom assessment, and an overall score obtained by analysing frequency of stools, abdominal pain, bloating and gas before and after therapy                                                                                                                                                                   | Improvement in overall symptom score was observed in 87.5% (95% CI: 52.9 to 97.8)                                                                                                                                                                                                                                                                                                                         |
| Majewski et al. (2007)[42]    | GI                        | Yes <sup>§</sup> (diagnostic criteria not reported) | Bloating, gas, abdominal pain, and bowel movements evaluated using a 4-point scale (non-disturbing or absent, mild, moderate; and severe)                                                                                                                                                                       | After therapy, among patients with diarrhoea, 85.7% (95% CI: 60.1 to 96) of patients stated that they had improvement in their symptom score > 50%; among patients with either gas and bloating or constipation, 33% (95% CI: 9.7 to 70) had improvement between 50% and 75%, and 50% (95% CI: 18.8 to 81.2) an improvement between 25% and 50%. 16.7% (95% CI: 3.0 to 56.4) had no response to treatment |
| Resmini et al. (2007)[43]     | Extra GI (Acromegaly)     | nr                                                  | Chronic diarrhoea, abdominal pain either in the upper or lower part, meteorism, flatulence, nausea, tenesmus, weight loss, constipation, and fever                                                                                                                                                              | Disappearance of symptoms in 60%° of the treated patients                                                                                                                                                                                                                                                                                                                                                 |
| Scarpellini et al. (2007)[44] | GI                        | Yes <sup>§</sup> (Rome II Criteria)                 | nr                                                                                                                                                                                                                                                                                                              | nr                                                                                                                                                                                                                                                                                                                                                                                                        |

GI, gastrointestinal; nr, not reported; IBS, irritable bowel syndrome; GSS, global symptom score; UDD, uncomplicated diverticular disease; VAS, visual analogue scale; ne, not possible to extract data.

<sup>§</sup>, part of the patients enrolled in the study presented IBS.

**Supporting Information**

**Table F.** Synopsis of evaluation of symptoms in patients with SIBO after therapy in the studies included in the meta-analysis (continued).

| Authors                     | Clinical Setting          | Diagnosis of IBS                        | Symptoms evaluated according to the Author definition                                                                                                                                                                             | Symptom Response according to the Author definition                                                                                         |
|-----------------------------|---------------------------|-----------------------------------------|-----------------------------------------------------------------------------------------------------------------------------------------------------------------------------------------------------------------------------------|---------------------------------------------------------------------------------------------------------------------------------------------|
| Yang et al. (2008)[45]      | GI                        | Yes<br>(Rome I Criteria)                | Percent improvement in IBS (number of participants with improvement of greater than 50%)                                                                                                                                          | 69% (95% CI: 58.5 to 77.9) of patients treated with rifaximin had a clinical response                                                       |
| Parodi et al. (2008)[46]    | Extra GI<br>(Scleroderma) | nr                                      | Diarrhoea, upper and lower abdominal pain/discomfort, bloating, abdominal tenderness, nausea, emesis, dysuria, tenesmus, fever, general illness each carrying a score from 0 (no symptoms) to 3 (severe); a GSS was calculated    | Eradicated patients had a significant decrease in the median GSS score (p<0.05)                                                             |
| Parodi et al. (2008)[47]    | Extra GI<br>(Rosacea)     | nr                                      | Diarrhoea, upper and lower abdominal pain/discomfort, bloating, abdominal tenderness, nausea, emesis, dysuria, tenesmus, fever, general illness assessed using a score from 0 (no symptoms) to 3 (severe); a GSS was calculated   | Eradicated patients had a significant decrease in the median GSS score (p=0.02)                                                             |
| Lauritano et al. (2009)[48] | GI                        | Yes <sup>§</sup><br>(Rome II Criteria)  | nr                                                                                                                                                                                                                                | nr                                                                                                                                          |
| Parodi et al. (2009)[49]    | GI                        | Yes <sup>§</sup><br>(Rome III Criteria) | Diarrhoea, upper and lower abdominal pain/discomfort, bloating, flatulence, abdominal tenderness, weight loss, nausea, constipation, and tenesmus assessed using a score from 0 (no symptoms) to 3 (severe); a GSS was calculated | The median symptom severity score significantly decreased (> 50%) in eradicated patients as compared with the not eradicated ones (p<0.001) |

GI, gastrointestinal; nr, not reported; IBS, irritable bowel syndrome; GSS, global symptom score; VAS, visual analogue scale; ne, not possible to extract data; <sup>§</sup>, part of the patients enrolled in the study presented IBS.

## Supporting Information

**Table F.** Synopsis of evaluation of symptoms in patients with SIBO after therapy in the studies included in the meta-analysis (continued).

| Authors                     | Clinical Setting                  | Diagnosis of IBS                        | Symptoms evaluated according to the Author definition                                                                                                                                                                                                                                                                                              | Symptom Response according to the Author definition                                                                                                                                                                                                                                                                                                                                                                  |
|-----------------------------|-----------------------------------|-----------------------------------------|----------------------------------------------------------------------------------------------------------------------------------------------------------------------------------------------------------------------------------------------------------------------------------------------------------------------------------------------------|----------------------------------------------------------------------------------------------------------------------------------------------------------------------------------------------------------------------------------------------------------------------------------------------------------------------------------------------------------------------------------------------------------------------|
| Peralta et al. (2009)[50]   | GI                                | Yes<br>(Rome II Criteria)               | According to their intestinal habits, patients were divided into a constipation-variant, diarrhoea-variant or alternated alveus-variant; the severity of the alveus disturbances was scored according to a 5-point semi-quantitative scale (0 = none; 1 = minimum; 2 = mild; 3 = moderate; 4 = severe)                                             | In eradicated patients, a statistically significant reduction of the symptomatological score was achieved ( $p = 0.003$ ); on the contrary, in non-eradicated patients no change in the symptomatological score was observed ( $p =$ not significant)                                                                                                                                                                |
| Furnari et al. (2010)[51]   | GI                                | nr                                      | Diarrhoea, upper and lower abdominal pain / discomfort, bloating, flatulence, abdominal tenderness, weight loss, nausea, constipation and tenesmus assessed using a score from 0 (no symptoms) to 3 (severe); a GSS was calculated                                                                                                                 | Clinical improvement ( $> 50\%$ GSS) was observed in 86.9% (95% CI: 67.9 to 95.5) and 91.1% (95% CI: 77.0 to 97.0) of eradicated cases in rifaximin and rifaximin-plus-partially hydrolysed guar gum group, respectively ( $p = 0.677$ ); among patients who did not obtain eradication, clinical improvement was observed in 7.1% (95% CI: 1.3 to 31.5) and 16.6% (95% CI: 3 to 56.46) respectively ( $P = 0.521$ ) |
| Lauritano et al. (2010)[52] | GI                                | nr                                      | nr                                                                                                                                                                                                                                                                                                                                                 | nr                                                                                                                                                                                                                                                                                                                                                                                                                   |
| Lombardo et al. (2010)[53]  | GI                                | Yes <sup>§</sup><br>(Rome III Criteria) | Pain severity, pain duration, pain frequency, bloating, and constipation/diarrhoea assessed using a 4-point scale (absence, mild, moderate, and severe)                                                                                                                                                                                            | In eradicated patients, bloating was improved or absent in 90%, diarrhoea in 94%, and abdominal pain in 92% of the cases; in non-eradicated patients, bloating was improved or absent in 30%, diarrhoea in 35%, and abdominal pain in 20% of the cases                                                                                                                                                               |
| Cerda et al. (2012)[54]     | GI                                | Yes<br>(Rome III Criteria)              | ne                                                                                                                                                                                                                                                                                                                                                 | ne                                                                                                                                                                                                                                                                                                                                                                                                                   |
| Meyrat et al. (2012)[55]    | GI                                | Yes<br>(Rome III Criteria)              | Bloating, diarrhoea, flatulence, abdominal pain and overall well-being. The symptom severity as well as changes in overall well-being assessed on a 11-point Likert scale, where 0 corresponded to absence of symptoms or no reduction in overall well-being and 10 corresponded to most severe symptoms or severe reduction in overall well-being | 2 and 12 weeks after completion of therapy a significant reduction in all the assessed items was observed ( $p \leq 0.015$ )                                                                                                                                                                                                                                                                                         |
| Fasano et al. (2013)[56]    | Extra GI<br>(Parkinson's disease) | ns                                      | ne                                                                                                                                                                                                                                                                                                                                                 | ne                                                                                                                                                                                                                                                                                                                                                                                                                   |

GI, gastrointestinal; nr, not reported; IBS, irritable bowel syndrome; GSS, global symptom score; VAS, visual analogue scale; ne, not possible to extract data.

<sup>§</sup>, part of the patients enrolled in the study presented IBS.

## Supporting Information

**Table F.** Synopsis of evaluation of symptoms in patients with SIBO after therapy in the studies included in the meta-analysis (continued).

| Authors                   | Clinical Setting      | Diagnosis of IBS                                     | Symptoms evaluated according to the Author definition                                                                                                                                               | Symptom Response according to the Author definition                                                                                                                                                   |
|---------------------------|-----------------------|------------------------------------------------------|-----------------------------------------------------------------------------------------------------------------------------------------------------------------------------------------------------|-------------------------------------------------------------------------------------------------------------------------------------------------------------------------------------------------------|
| Boltin et al. (2014)[57]  | GI                    | Excluded IBS patients according to Rome III criteria | Bloating, flatulence                                                                                                                                                                                | No patients reported any degree of resolution for either bloating or flatulence                                                                                                                       |
| Chedid et al. (2014)[58]  | GI                    | Yes <sup>§</sup><br>(Rome III Criteria)              | nr                                                                                                                                                                                                  | nr                                                                                                                                                                                                    |
| Moraru et al. (2014)[59]  | GI                    | Yes <sup>§</sup><br>(Rome III Criteria)              | Severity (using a Likert scale) and type of IBS symptoms                                                                                                                                            | Among IBS patients treated with rifaximin 46.7% (95% CI. 37.4 to 56.2) had a complete response, 31.4% (95% CI. 23.3 to 40.8) had a partial response, and 21.9% (95% CI. 15.1 to 30.7) had no response |
| Gravina et al. (2015)[60] | Extra GI<br>(Rosacea) | ns                                                   | Upper GI symptoms using SF-LDQ + bloating, flatulence, abdominal pain, diarrhoea and constipation using a questionnaire assessing frequency and severity of each symptom during the last two months | nr                                                                                                                                                                                                    |

GI, gastrointestinal; nr, not reported; IBS, irritable bowel syndrome; GSS, global symptom score; VAS, visual analogue scale; ne, not possible to extract data; SF-LDQ, Short-Form Leeds Dyspepsia Questionnaire.

<sup>§</sup>, part of the patients enrolled in the study presented IBS.



**Supporting Information****Table G.** Meta-regression of adverse events rates\*.

| Covariate                      | Number of Studies | Coefficient | 95% CI            | p value |
|--------------------------------|-------------------|-------------|-------------------|---------|
| RCT                            | 4                 | ref         |                   |         |
| No RCT                         | 13                | -1.577      | -2.484 to -0.670  | 0.002   |
| Dosage of rifaximin            | 17                | 0.0005      | -0.0009 to 0.0018 | 0.446   |
| Duration of treatment          | 17                | 0.026       | -0.059 to 0.112   | 0.520   |
| Sample Size ≥ 50 patients      | 5                 | ref         |                   |         |
| Sample Size < 50 patients      | 12                | 0.514       | -0.268 to 1.296   | 0.180   |
| Studies performed in Italy     | 12                | ref         |                   |         |
| Studies not performed in Italy | 5                 | 0.771       | -0.700 to 2.243   | 0.279   |

\*: concomitant use of fibre, mesalazine, pre or probiotics was not evaluated as all the studies included in the model used only rifaximin.  
ref, reference.

## Supporting Information

**Table H.** Sub-group analysis of adverse event rate\*.

| Variable                                                             | Number of Studies | Adverse Event Rate | 95% CI      |
|----------------------------------------------------------------------|-------------------|--------------------|-------------|
| <b>Randomization</b>                                                 |                   |                    |             |
| RCTs                                                                 | 4                 | 13.1%              | 9.4 to 18.1 |
| Not RCTs                                                             | 13                | 4.6%               | 3.0 to 6.9  |
| <b>Daily dose of rifaximin and duration of treatment<sup>°</sup></b> |                   |                    |             |
| 600 mg/die for 7 days                                                | 1                 | 10%                | 3.3 to 26.8 |
| 800 mg/die for 7 days                                                | 1                 | 13.3%              | 5.1 to 30.6 |
| 800 mg/die for 14 days                                               | 1                 | 4.7%               | 1.5 to 10.7 |
| 800 mg/die for 28 days                                               | 2                 | 3.6%               | 0.5 to 21.7 |
| 1200 mg/die for 7 days                                               | 8                 | 8.8%               | 4.8 to 15.6 |
| 1200 mg/die for 10 days                                              | 4                 | 3.5%               | 1.0 to 11.4 |
| 1200 mg/die for 14 days                                              | 1                 | 2.0%               | 0.7 to 6.1  |
| 1200 mg/die for 28 days                                              | 1                 | 9.0%               | 4.1 to 18.5 |
| 1600 mg/die for 7 days                                               | 1                 | 15.0%              | 6.9 to 29.6 |
| <b>Number of patients enrolled in the study</b>                      |                   |                    |             |
| ≥ 50 patients                                                        | 5                 | 5.1%               | 2.7 to 9.5  |
| < 50 patients                                                        | 12                | 10.9%              | 7.7 to 15.3 |
| <b>Country where the study was performed</b>                         |                   |                    |             |
| Italy                                                                | 12                | 8.0%               | 5.1 to 12.3 |
| Other Countries                                                      | 5                 | 6.1%               | 3.5 to 10.3 |

\*: concomitant use of fibre, mesalazine, pre or probiotics was not evaluated as all the studies included in the model used only rifaximin.

<sup>°</sup>: number of studies is > 17 as several trials had ≥ 2 arms evaluating different doses and/or treatment durations.

**Supporting Information**

**Figure A.** Funnel plot of SIBO eradication rate according to ITT analysis.

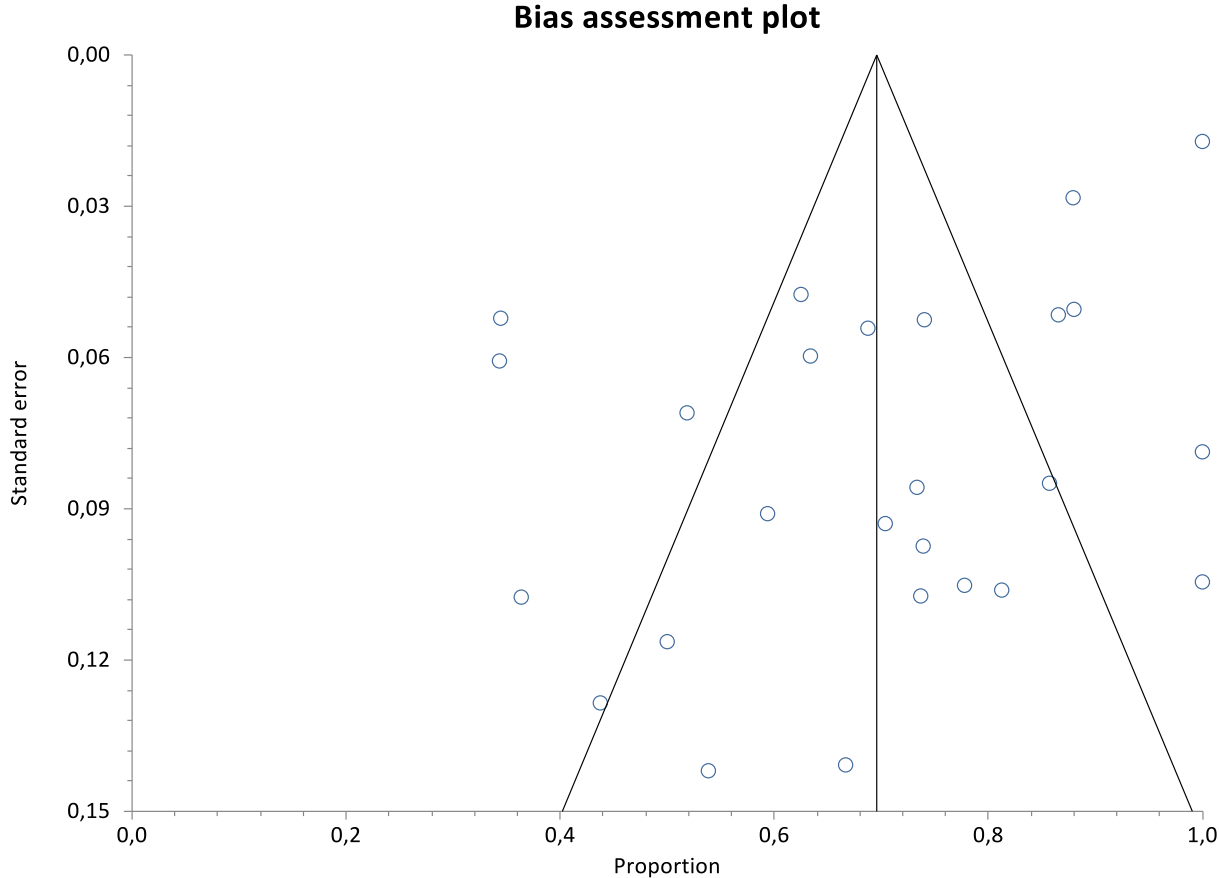

## Supporting Information

Figure B. Forest plot of SIBO eradication rate according to PP analysis.

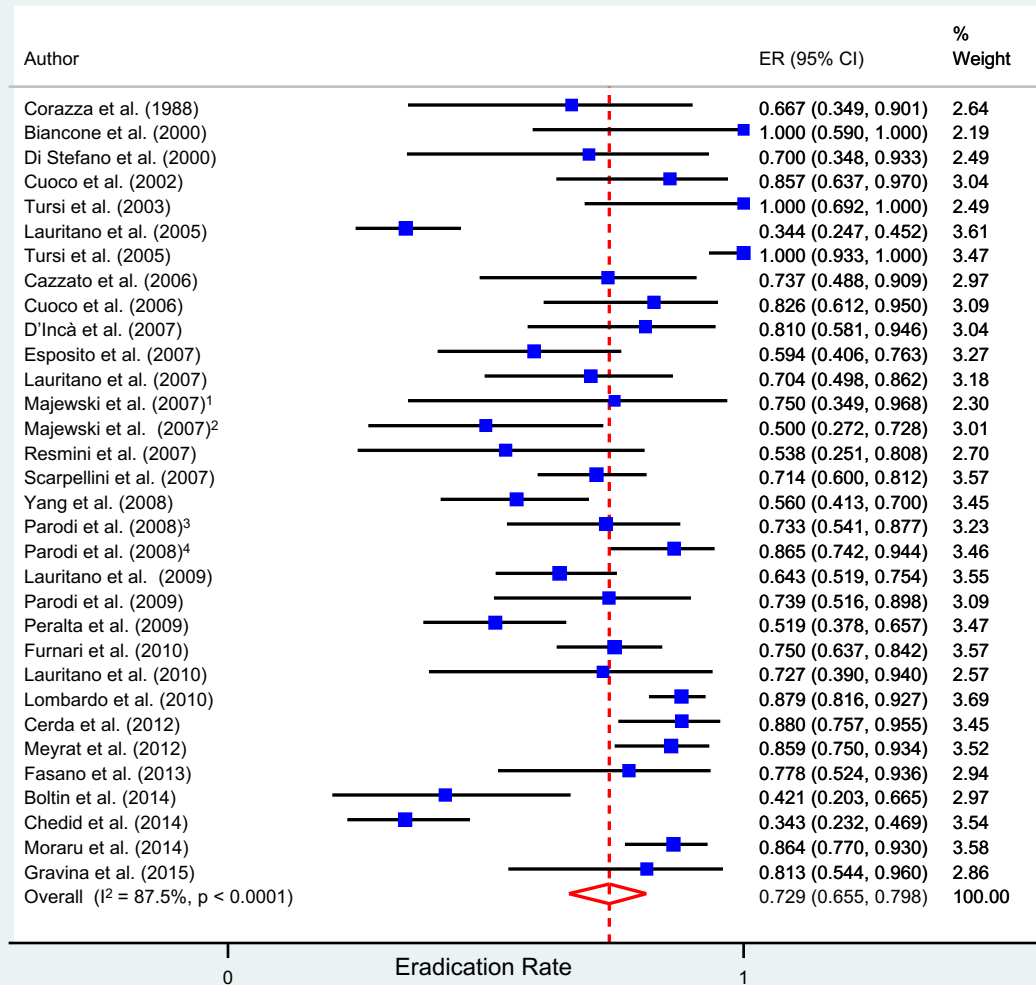

ER, eradication rate.

1, ref; 41; 2, ref. 42; 3, ref; 46; 4, ref. 47.



**Supporting Information**

**Figure D.** Funnel plot of SIBO eradication rate in IBS according to ITT analysis.

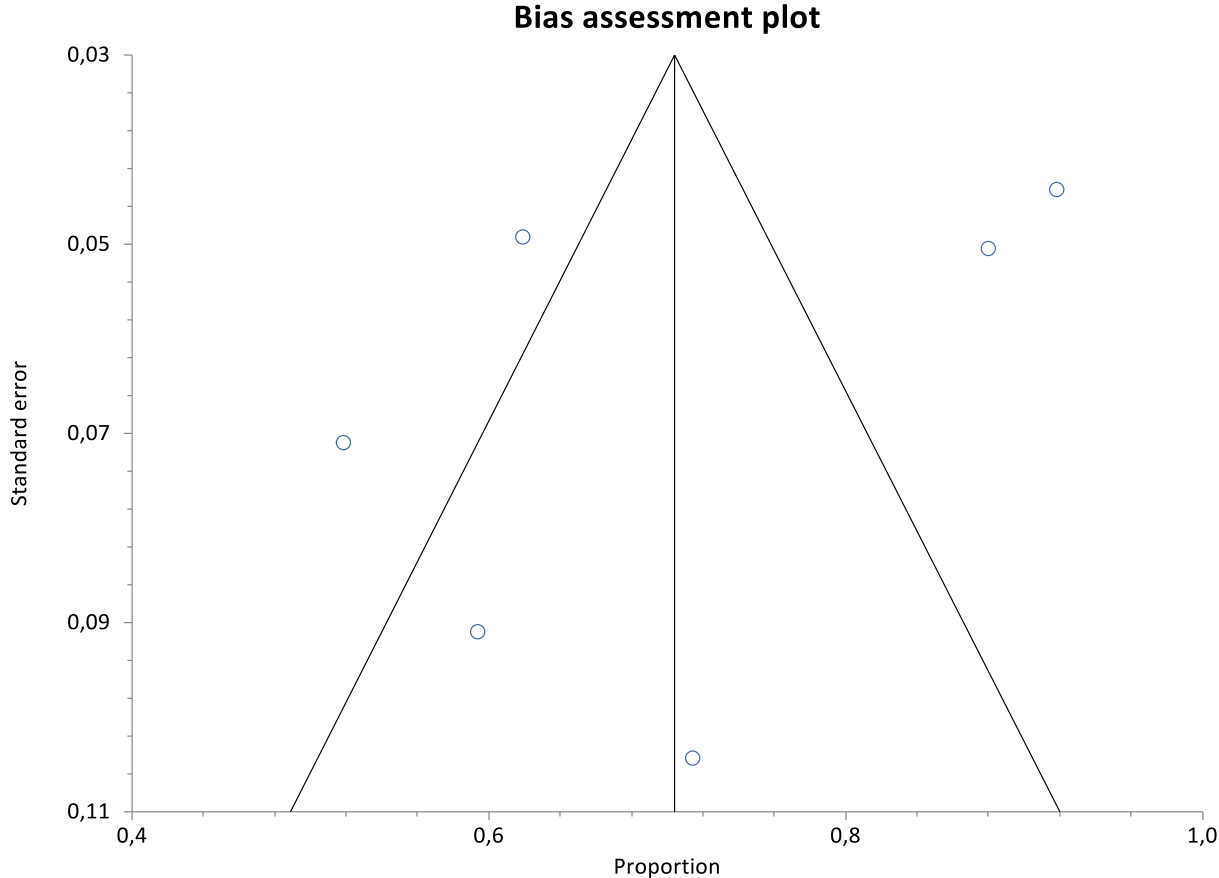

## Supporting Information

**Figure E.** Forest plot of SIBO eradication rate in IBS according to PP analysis.

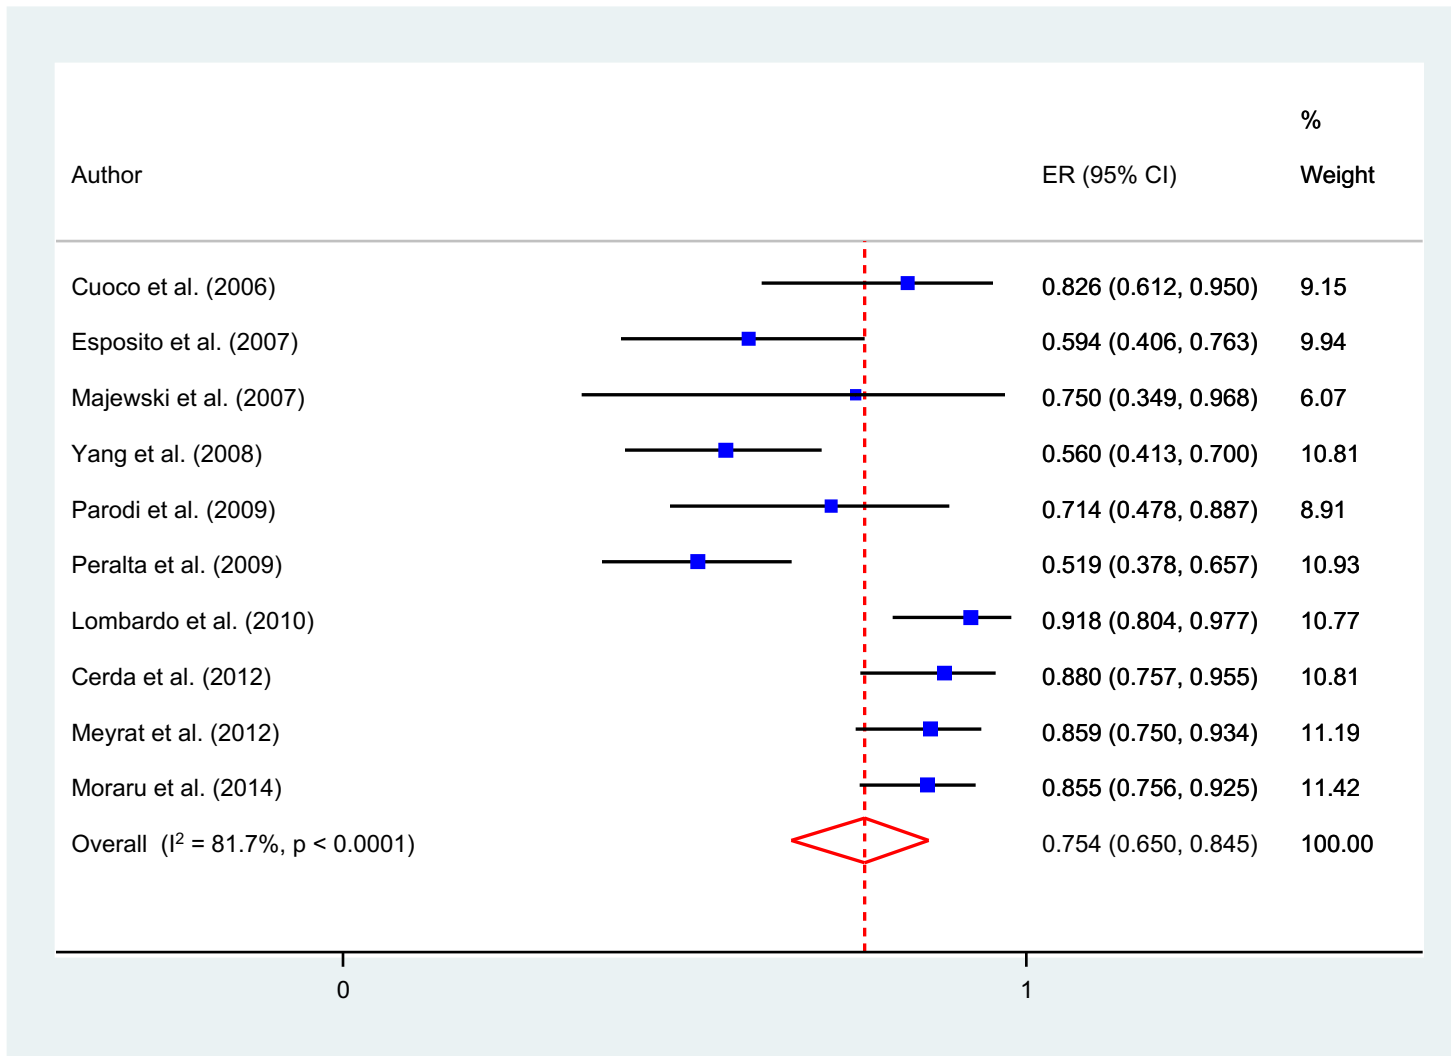

ER, eradication rate.

**Supporting Information**

**Figure F.** Funnel plot of SIBO eradication rate in IBS according to PP analysis.

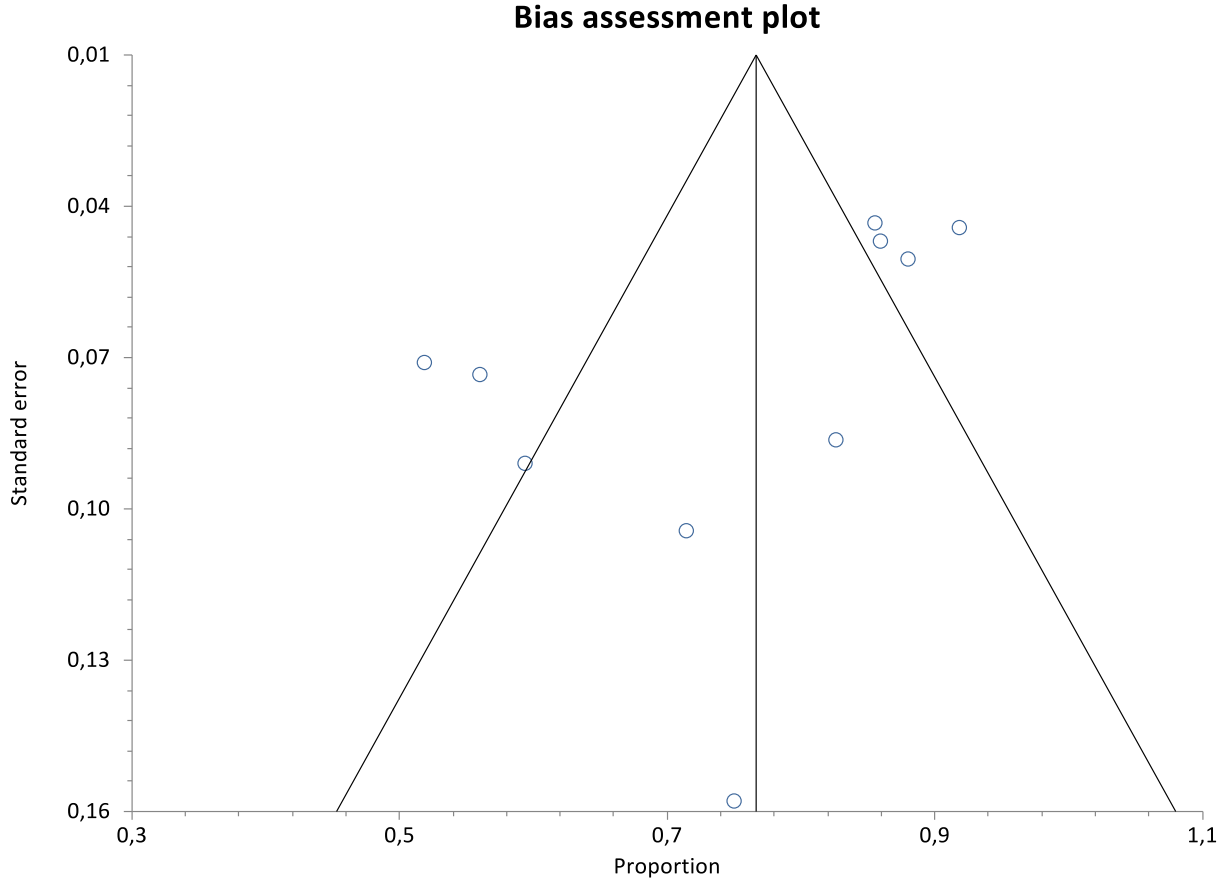



## Supporting Information

**Figure G.** Forest plot of SIBO eradication rate in Extra GI settings according to ITT analysis.

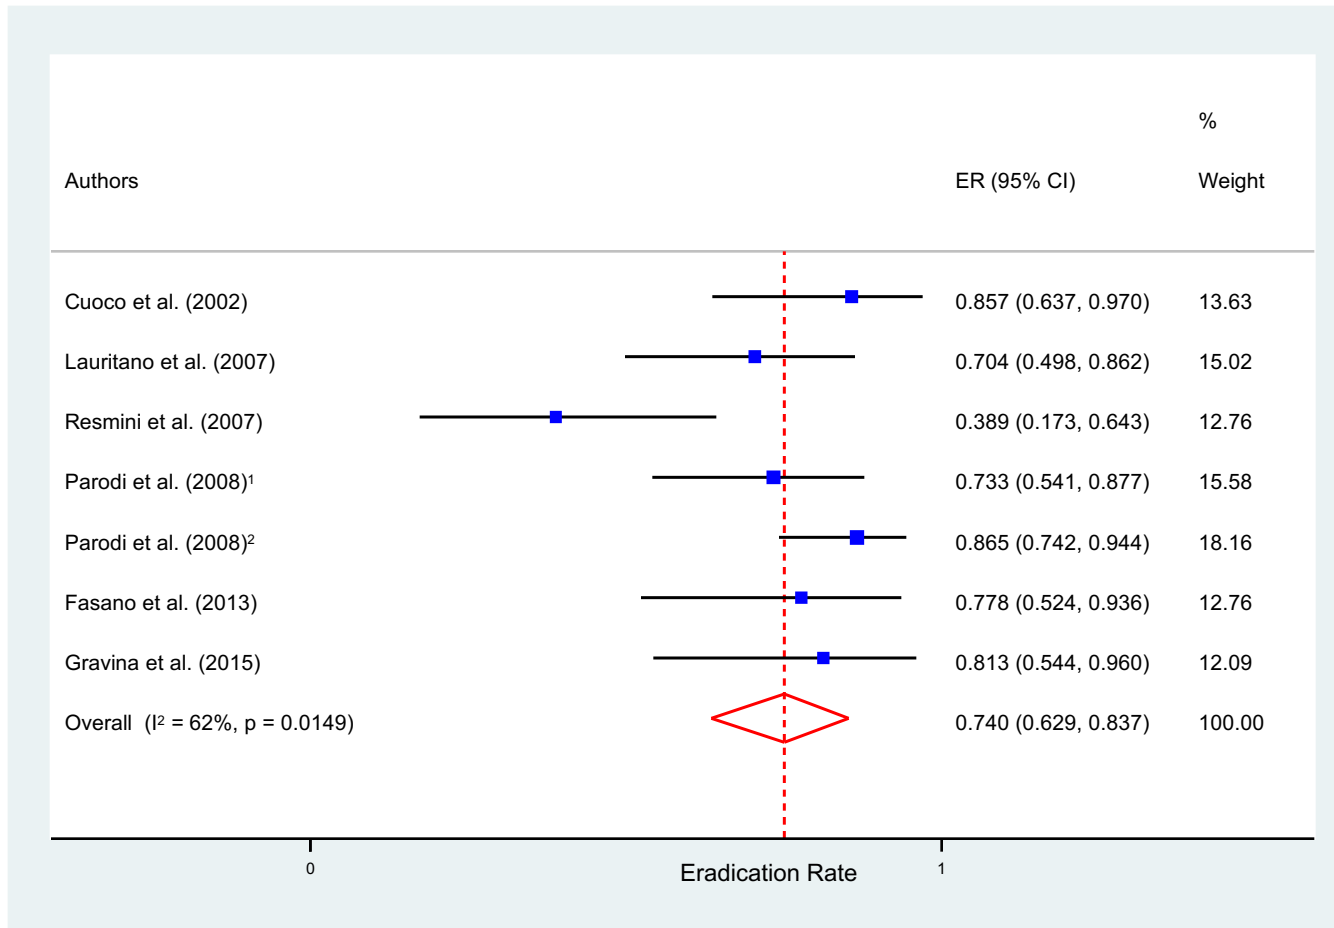

ER, eradication rate.  
1, ref; 46; 2, ref. 47.

**Supporting Information**

**Figure H.** Funnel plot of SIBO eradication rate in Extra GI settings according to ITT analysis.

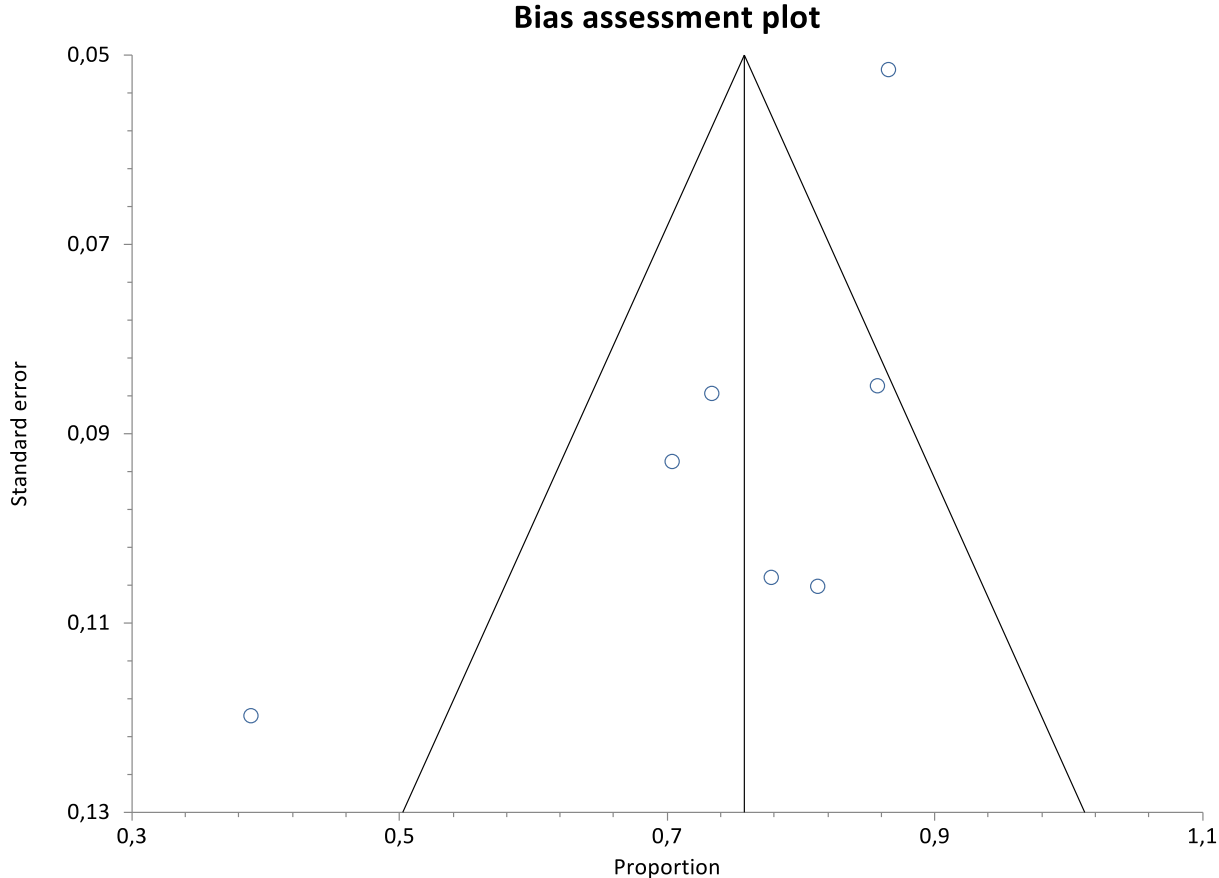

## Supporting Information

Figure I. Forest plot of SIBO eradication rate in Extra GI settings according to PP analysis.

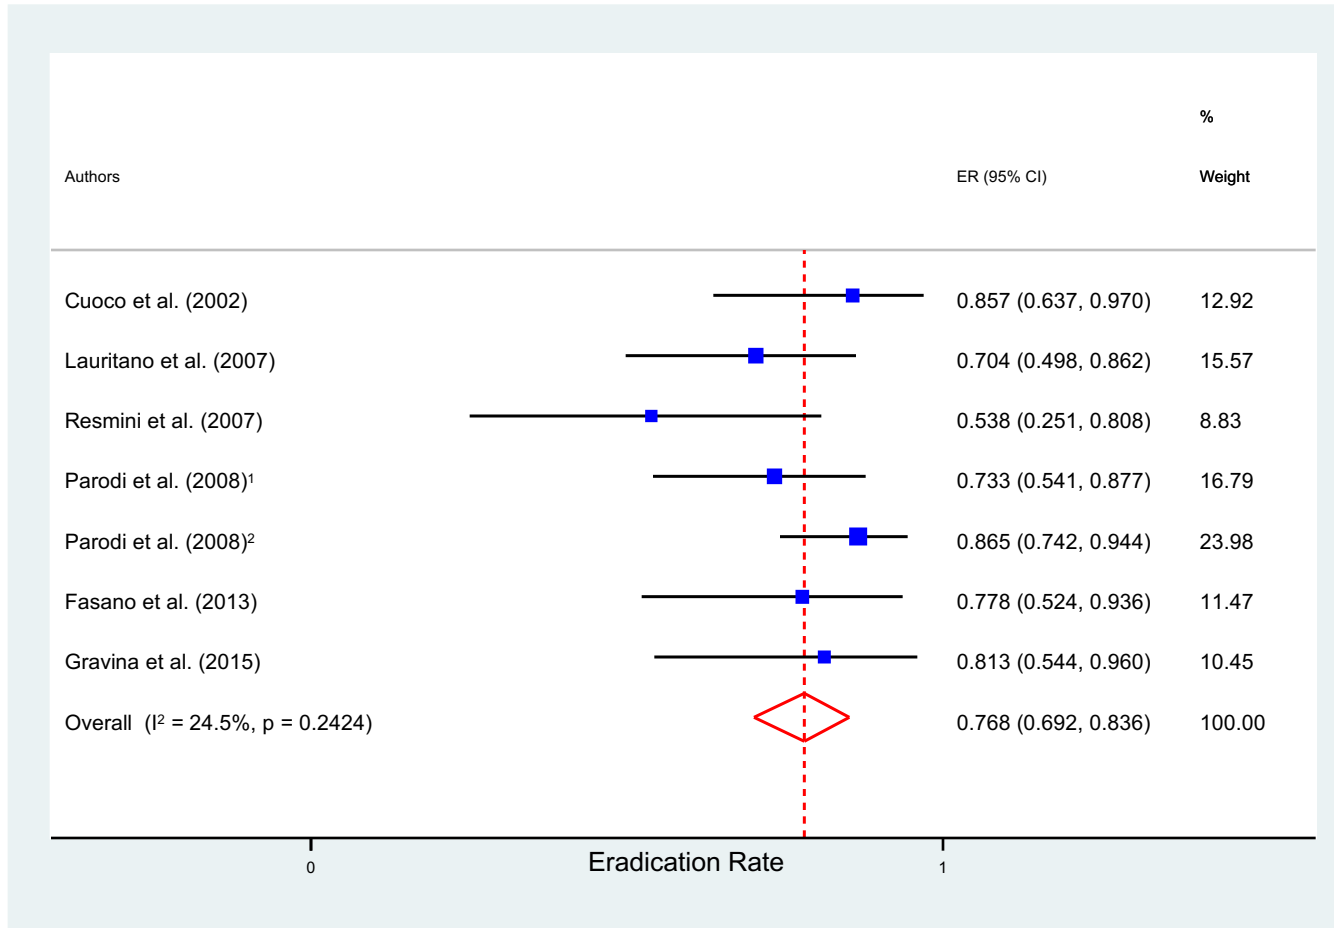

ER, eradication rate.  
1, ref; 46; 2, ref. 47.

**Supporting Information**

**Figure J.** Funnel plot of SIBO eradication rate in Extra GI settings according to PP analysis.

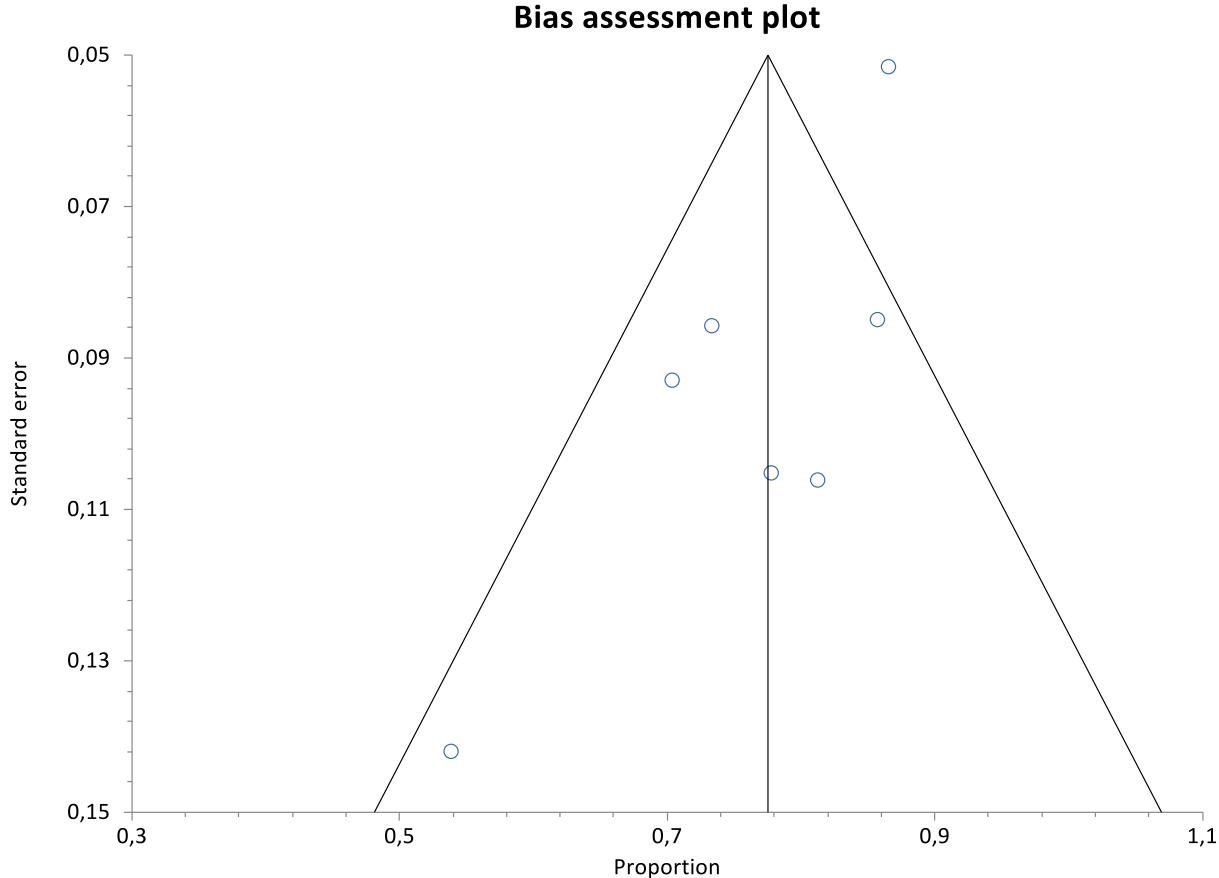

### Supporting Information

**Figure K.** Forest Plot: rifaximin vs. other antimicrobials in RCTs according to ITT analysis.

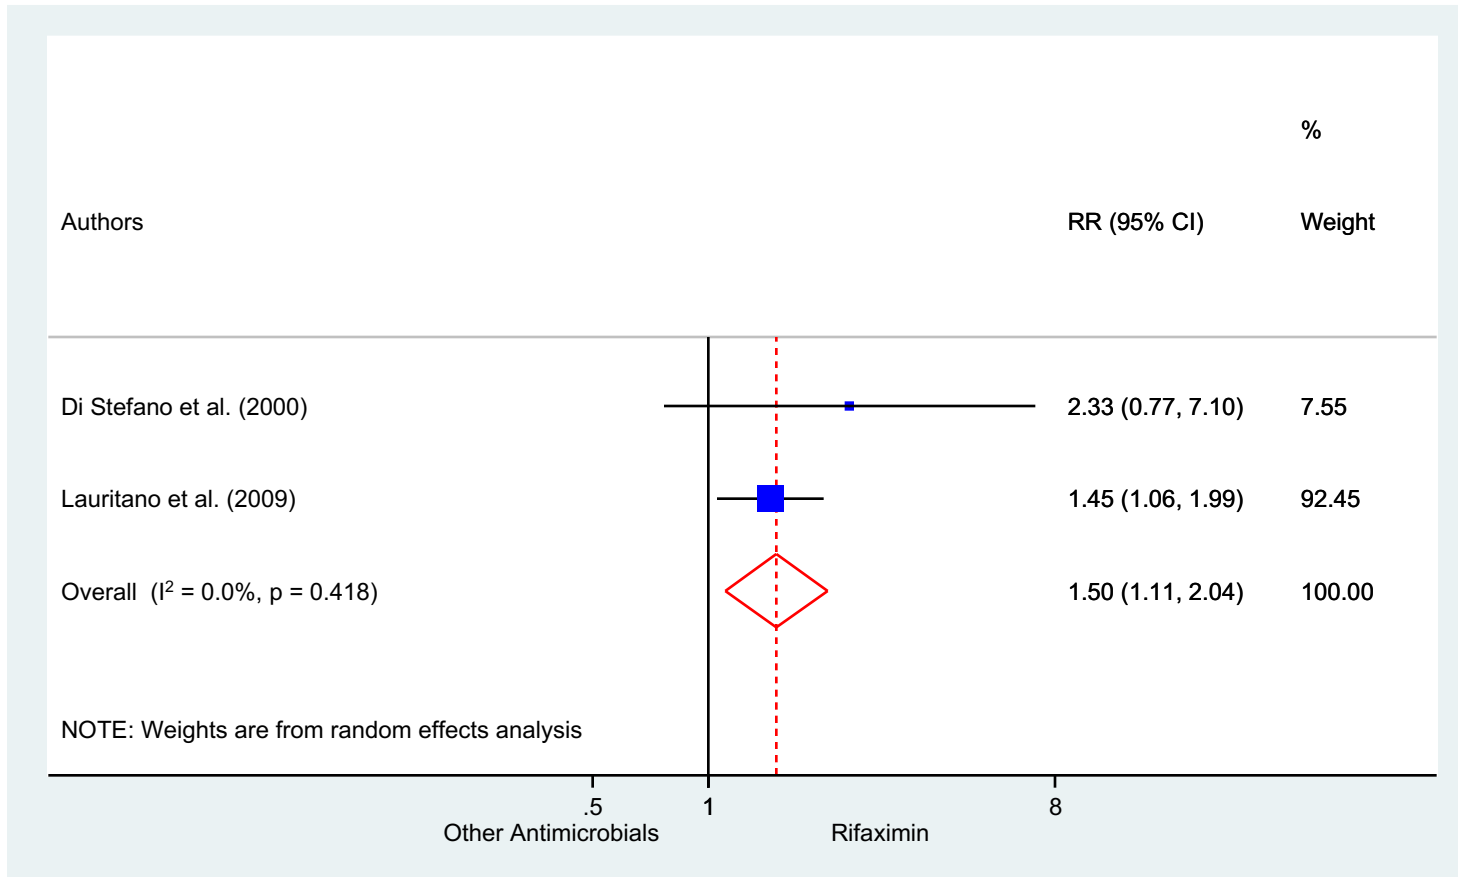

RR, relative risk.

### Supporting Information

Figure L. Forest plot: rifaximin vs. other antimicrobials in RCTs according to PP analysis.

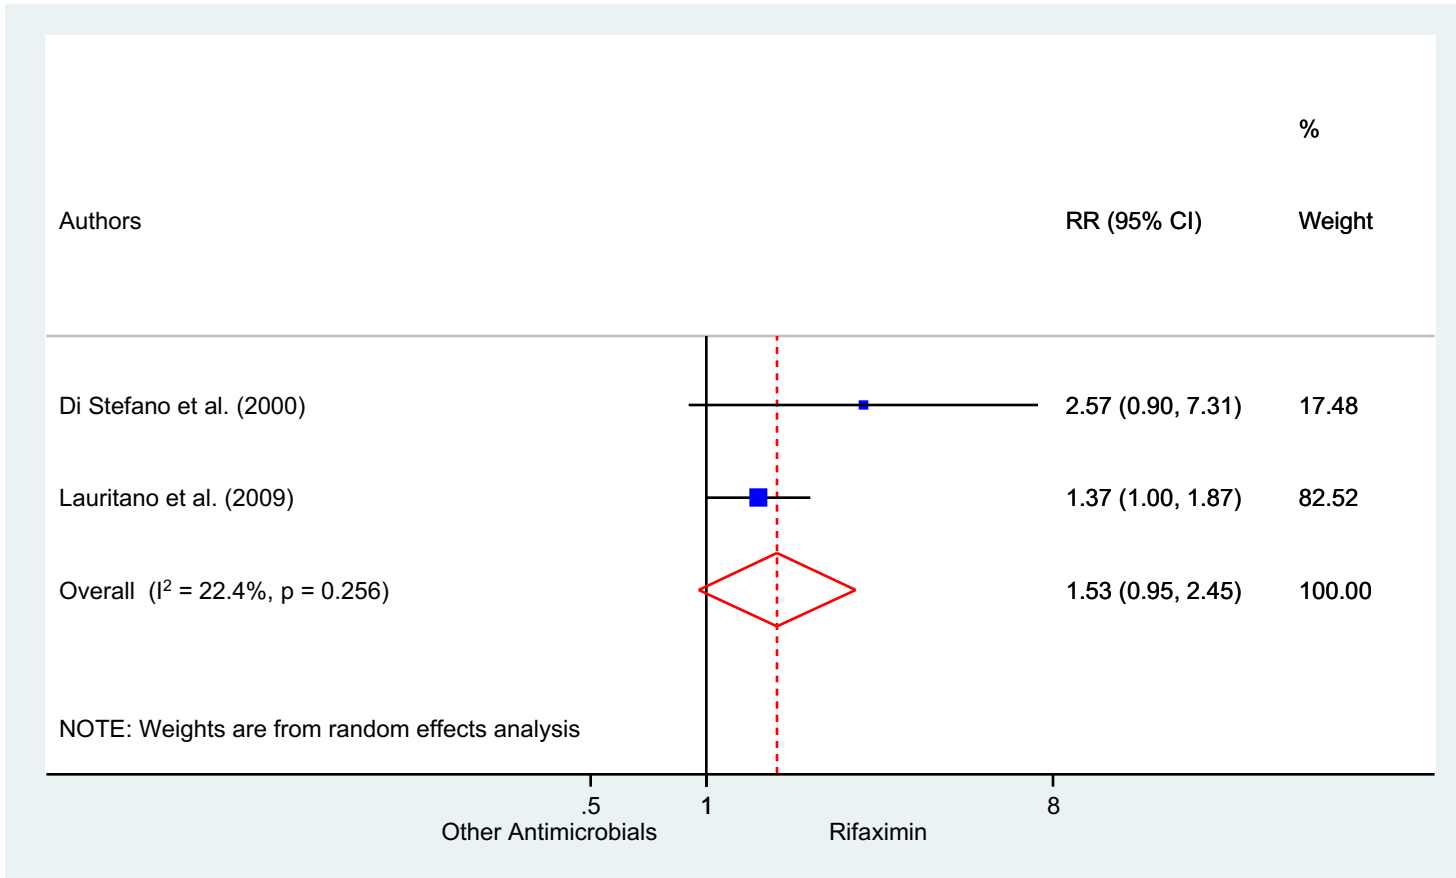

RR, relative risk.

## Supporting Information

**Figure M.** Symptom evaluation before and after treatment with rifaximin.

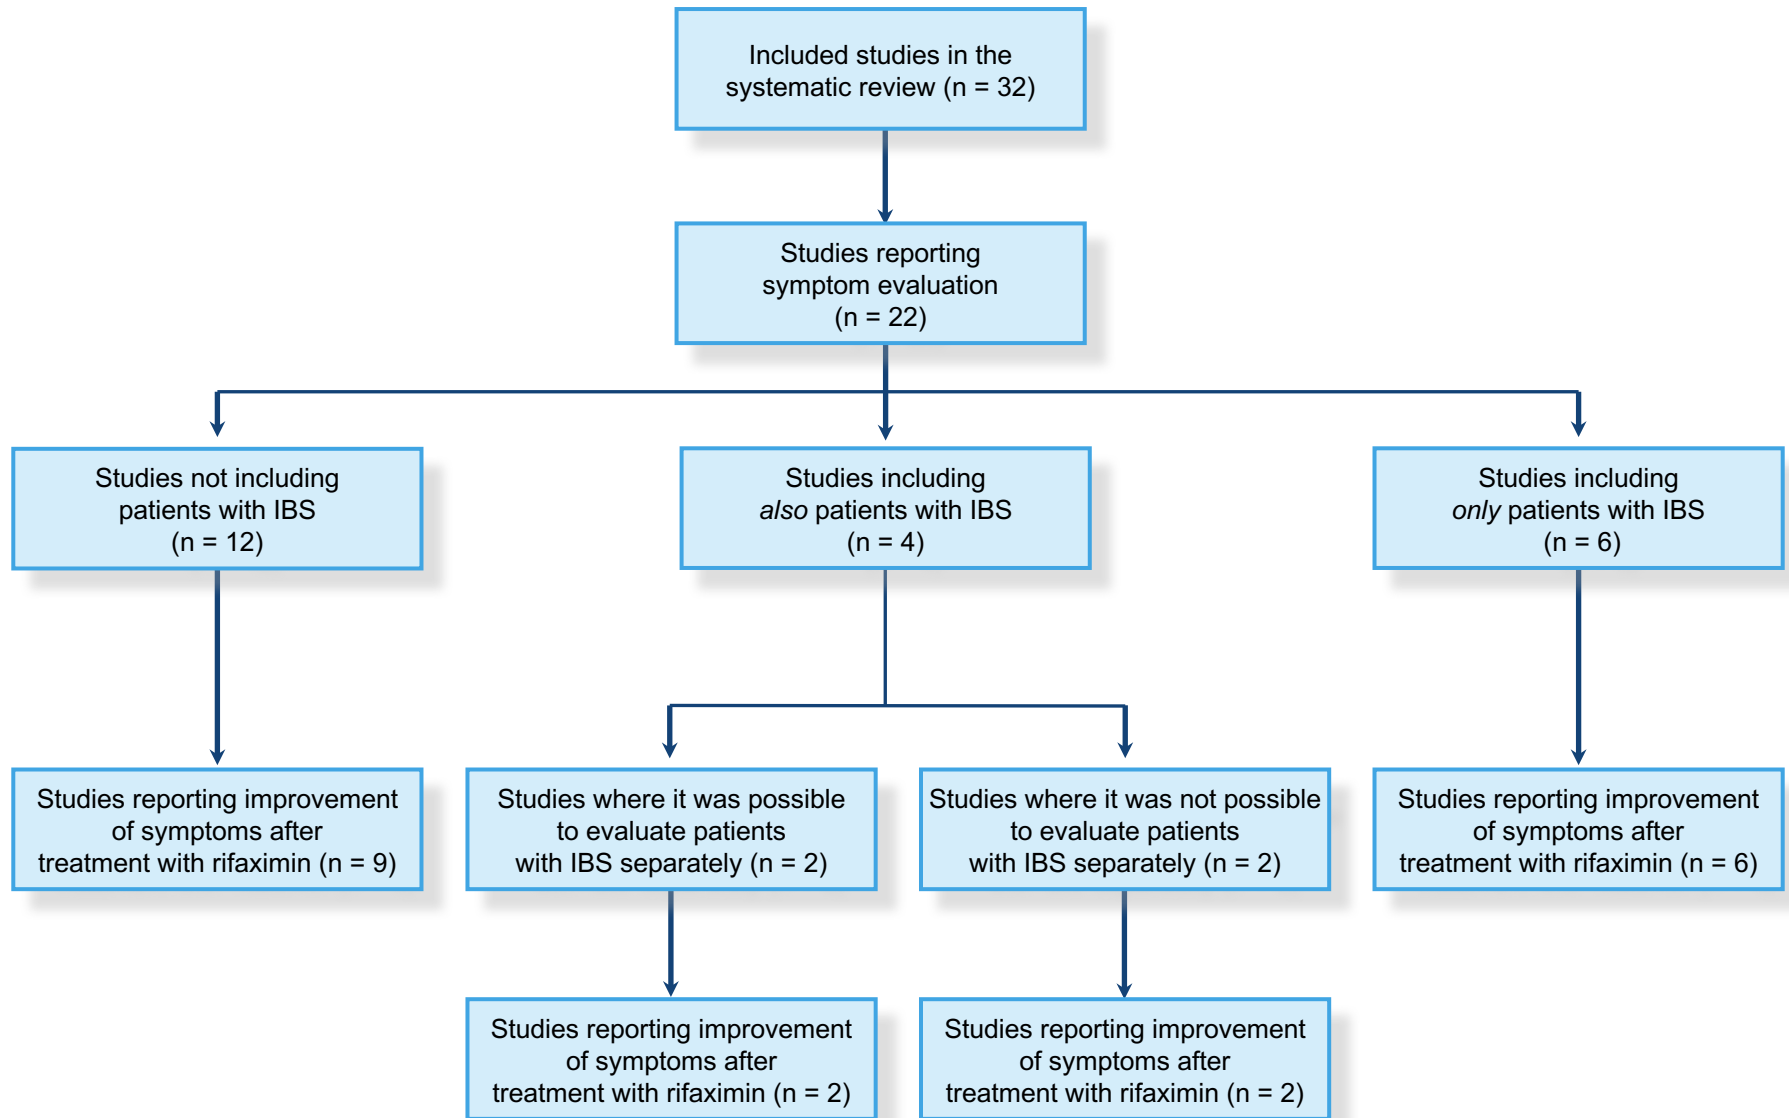

## Supporting Information

**Figure N.** Forest plot of improvement/resolution of symptom in patients eradicated from SIBO.

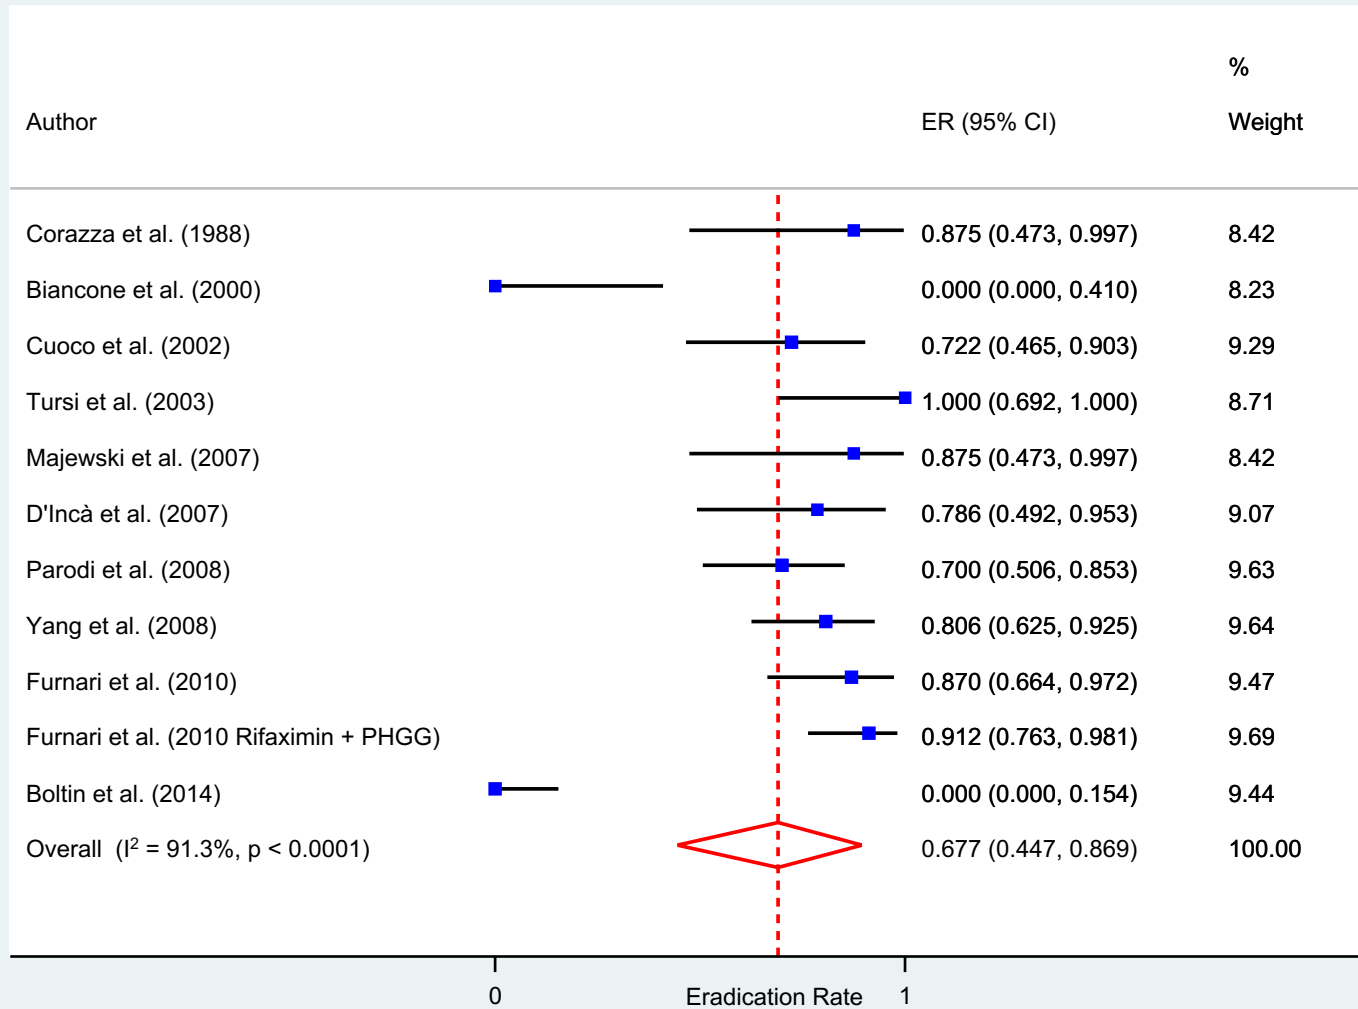

ER, eradication rate.



### Supporting Information

**Figure O.** Funnel plot of improvement/resolution of symptom in patients eradicated from SIBO.

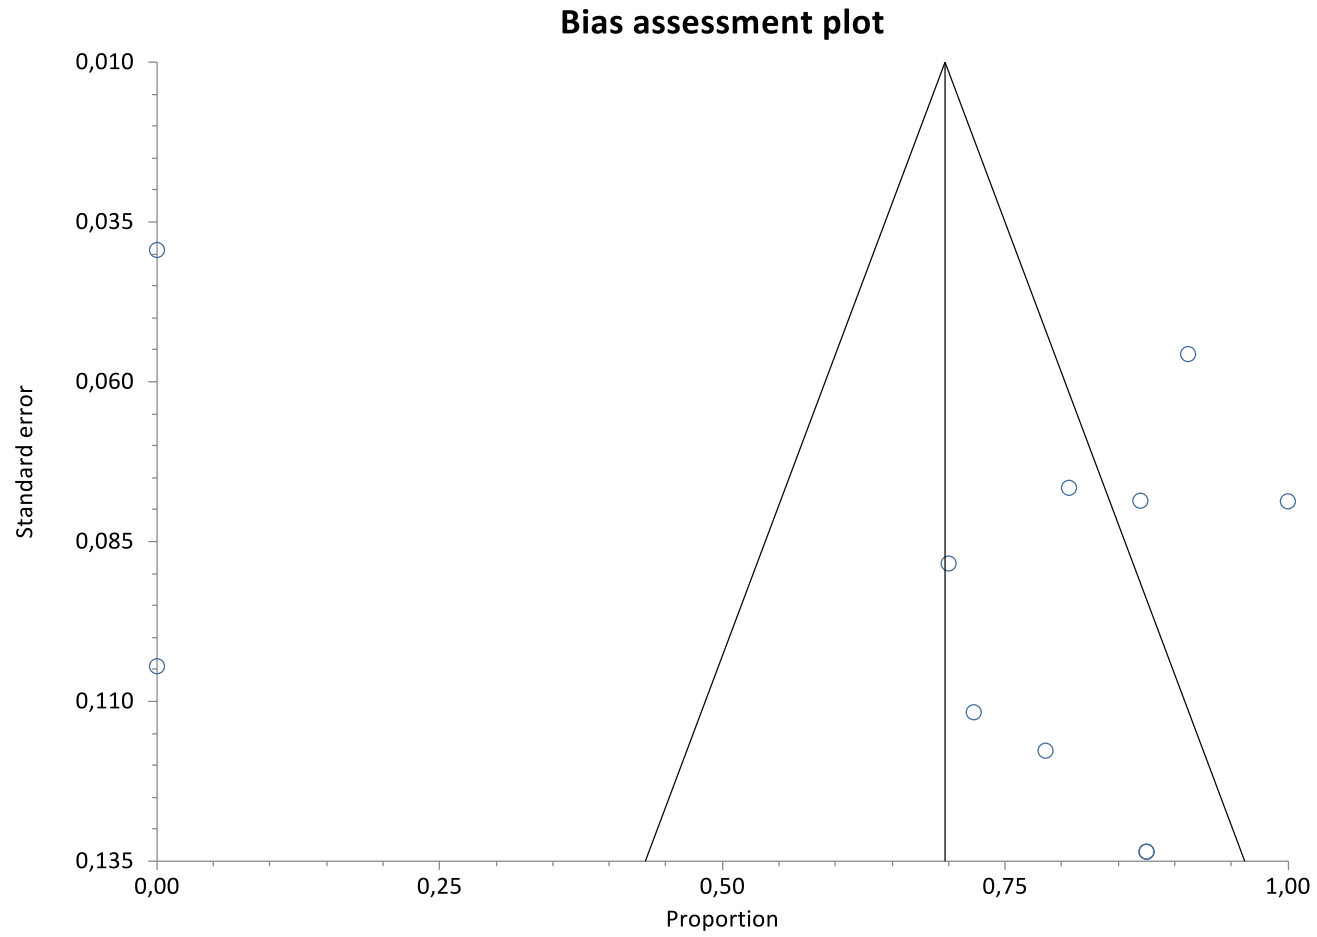

**Supporting Information**

**Figure P.** Funnel plot of adverse events in patients taking rifaximin alone for SIBO eradication.

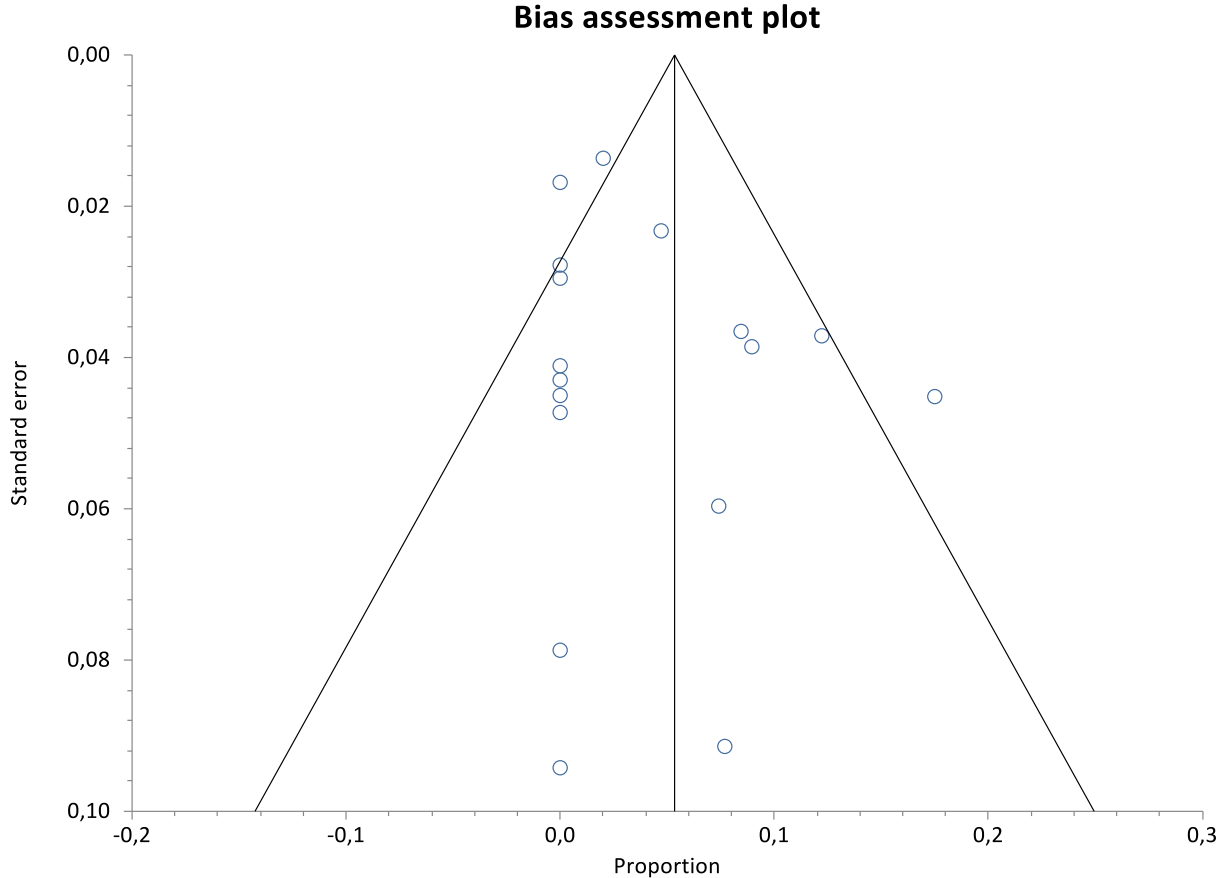

Supplement: APT-45-604-s001.pdf [file APT-45-604-s001.pdf]
